1  
2  
3  
4  
5  
6  
7  
8  
9  
10  
11  
12  
13  
14  
15  
16  
17  
18

## Enhancer identification and activity evaluation in the red flour beetle, *Tribolium castaneum*

**Yi-Ting Lai<sup>1</sup>, Kevin D. Deem<sup>1</sup>, Ferran Borràs-Castells<sup>1</sup>, Nagraj Sambrani<sup>1</sup>, Heike Rudolf<sup>2</sup>, Kushal Suryamohan<sup>3</sup>, Ezzat El-Sherif<sup>2</sup>, Marc S. Halfon<sup>3</sup>, Daniel J. McKay<sup>4</sup>, and Yoshinori Tomoyasu<sup>1‡</sup>**

<sup>1</sup>Department of Biology, Miami University, Oxford OH 45056, <sup>2</sup>Friedrich-Alexander-Universität Erlangen-Nürnberg, Erlangen 91058, Germany, <sup>3</sup>Department of Biochemistry, State University of New York at Buffalo, Buffalo, NY 14214, <sup>4</sup>Department of Biology, Department of Genetics, Integrative Program for Biological and Genome Sciences, University of North Carolina at Chapel Hill, Chapel Hill, NC 27599,

<sup>‡</sup>Author for correspondence ([tomoyay@miamioh.edu](mailto:tomoyay@miamioh.edu))

19 **ABSTRACT**

20 Evolution of *cis*-properties (such as enhancers) often plays an important role in the  
21 production of diverse morphology. However, a mechanistic understanding is often  
22 limited by the absence of methods to study enhancers in species outside of  
23 established model systems. Here, we sought to establish methods to identify and test  
24 enhancer activity in the red flour beetle, *Tribolium castaneum*. To identify possible  
25 enhancer regions, we first obtained genome-wide chromatin profiles from various  
26 tissues and stages of *Tribolium* via FAIRE (Formaldehyde Assisted Isolation of  
27 Regulatory Elements)-sequencing. Comparison of these profiles revealed a distinct  
28 set of open chromatin regions in each tissue and stage. Second, we established the  
29 first reporter assay system that works in both *Drosophila* and *Tribolium*, using *nubbin*  
30 in the wing and *hunchback* in the embryo as case studies. Together, these advances  
31 will be useful to study the evolution of *cis*-language and morphological diversity in  
32 *Tribolium* and other insects.

33

34 **KEY WORDS:** Enhancer, Reporter assay, *Tribolium*, Chromatin profiling, FAIRE-seq

35

## 36 INTRODUCTION

37 Insects display some of the greatest diversity of morphology found amongst eukaryotic taxa,  
38 offering a variety of opportunities to investigate molecular and developmental mechanisms  
39 underlying morphological evolution. Decades of studies in evolutionary developmental  
40 biology (evo-devo) have revealed that changes in gene regulatory networks (GRNs) have  
41 been a major driving force in the production of the diverse morphology seen in insects as  
42 well as in other taxa (Carroll, 2008; Carroll et al., 2005). In general, a GRN can be divided  
43 into two components: *trans* and *cis*. *trans* components are transcription factors (TFs) and  
44 their upstream regulators (such as signal transduction pathways) that provide instructive cues  
45 for patterning and differentiation to the tissues where they are expressed. In contrast, *cis*  
46 components are non-coding DNA elements (*i.e.* *cis*-regulatory elements, CREs) that gather  
47 and process the upstream *trans* information and determine the spatial and temporal  
48 expression of the genes downstream in the genetic pathway. Changes in both *cis* and *trans*  
49 components have been implicated in morphological evolution (Carroll, 2008; Carroll et al.,  
50 2005; Halfon, 2017).

51 By embracing unparalleled genetic tools, both *cis* and *trans* factors have been  
52 analyzed in great detail in the fruit fly, *Drosophila melanogaster*. The accumulated  
53 knowledge obtained from *Drosophila* studies can be used as a reference (*i.e.* the *Drosophila*  
54 paradigm) when studying other insects and identifying the changes in GRNs responsible for  
55 morphological evolution. RNA interference (RNAi)-based gene knock-down techniques have  
56 allowed for an investigation of the *trans* properties involved in development and their  
57 evolutionary conservation/diversification in various insects (Belles, 2010). However, the lack  
58 of a reliable method to identify *cis* properties in non-*Drosophila* insects has made it difficult  
59 to study the evolution of *cis* properties beyond *Drosophila* species, even though it is equally  
60 important to study *cis* properties to gain a more comprehensive view of changes in GRNs that

61 contributed to morphological evolution.

62         The major difficulty in identifying CREs, such as enhancers, stems from the labile  
63 nature of *cis* properties. The genes that code for *trans* factors important for development are  
64 usually evolutionarily well-conserved, thus it is relatively easy to identify these *trans*  
65 properties in various insects based on their homologies (Carroll et al., 2005). In contrast, *cis*  
66 properties appear to be more evolutionarily flexible in a variety of aspects. First, the order of  
67 TF binding sites can vary widely within an enhancer region, and the location of enhancers  
68 relative to the target gene also appears to be variable. Second, there can be redundancy  
69 among multiple enhancers responsible for the same gene (i.e. shadow enhancers) (Hong et al.,  
70 2008), allowing them to evolve more rapidly. In addition, the function of each enhancer tends  
71 to exhibit low levels of pleiotropy (Carroll, 2008), resulting in the accumulation of more  
72 evolutionary changes in enhancers. These characteristics, along with the faster rate of genome  
73 evolution in insects compared to vertebrates (Zdobnov and Bork, 2007), make the  
74 identification of insect enhancers a challenging task.

75         Traditionally, enhancers have been identified through reporter assays, in which the  
76 transcriptional activation capability of genomic regions near the gene of interest are assessed  
77 via a reporter gene construct (see (Suryamohan and Halfon, 2015) to review traditional as  
78 well as new methods to identify enhancers). This is a time-consuming and arduous approach,  
79 as an enhancer can sometimes reside hundreds of thousands of base pairs away from the gene  
80 that the enhancer regulates (Shlyueva et al., 2014). Identification of evolutionarily conserved  
81 genomic regions outside of coding regions among several closely related species, such as the  
82 *Drosophila* species group, has been helpful in narrowing down regions to survey for enhancer  
83 activity (phylogenetic footprinting) (Frazer et al., 2004; Mayor et al., 2000; Sosinsky et al.,  
84 2007; Stark et al., 2007). Enhancer predictions based on the TF binding motifs have also been  
85 helpful in identifying potential enhancer regions, although the prediction appears to work

86 more efficiently for embryonic enhancers due to the clustering tendency of TF binding motifs  
87 within an enhancer active during the syncytial blastoderm stage, while enhancers for other  
88 stages might be more difficult to identify through current prediction methods (Li et al., 2007).  
89 Combinations of these approaches have allowed for successful identification of enhancers  
90 that are active in various developmental contexts in *Drosophila*. More recently, the reporter  
91 assay approach has been applied in a genome-wide fashion in *Drosophila* (such as The  
92 FlyLight project), identifying over ten thousand genomic regions capable of activating  
93 transcription (Jenett et al., 2012; Jory et al., 2012; Kvon et al., 2014; Pfeiffer et al., 2008).  
94 Unfortunately, many of these approaches are technically demanding and resource-intensive,  
95 and thus are currently only possible in *Drosophila* (but also see (Kazemian et al., 2014) for  
96 the successful application of enhancer prediction in non-*Drosophila* insects).

97         In parallel to the above methods, several genomic approaches have been developed  
98 for the identification of possible enhancer regions in the *Drosophila* genome (reviewed in  
99 (Shlyueva et al., 2014; Suryamohan and Halfon, 2015)). One such method is  
100 Formaldehyde-Assisted Isolation of Regulatory Elements (FAIRE) in combination with next  
101 generation sequencing (FAIRE-seq), which identifies open chromatin regions genome-wide  
102 (Simon et al., 2012). FAIRE-seq has been used in *Drosophila*, showing that open chromatin  
103 regions often correspond to enhancers and other CREs (McKay and Lieb, 2013; Pearson et al.,  
104 2016; Uyehara et al., 2017). In addition, FAIRE-seq requires less input material and does not  
105 rely on antibodies, thus making it less technically demanding compared to techniques like  
106 Chromatin Immunoprecipitation sequencing (ChIP-seq). These features also make FAIRE a  
107 promising technique to apply to non-*Drosophila* insects. However, it is important to note that  
108 potential enhancers identified by FAIRE (or other genomic approaches) still require  
109 functional validations, such as with a reporter assay. This presents another significant hurdle  
110 when studying enhancers in non-*Drosophila* insects, as the availability of a modern genetic

111 toolkit (such as a versatile reporter construct) is very limited outside of the *Drosophila*  
112 species.

113 In this study, we set out to establish an enhancer identification and evaluation method  
114 in the red flour beetle, *Tribolium castaneum*. *Tribolium* offers a wide variety of genetic and  
115 genomic tools, making this insect a powerful model system for comparative developmental  
116 biology and evo-devo studies (Denell, 2008; Schmitt-Engel et al., 2015; Tribolium Genome  
117 Sequencing et al., 2008; Wang et al., 2007). The robust systemic RNAi response of *Tribolium*  
118 has allowed researchers to study *trans* properties in detail (Brown et al., 1999; Bucher et al.,  
119 2002; Tomoyasu and Denell, 2004) and identify changes in GRNs responsible for  
120 morphological evolution from the *trans* point of view (see (Peel, 2008) to review the findings  
121 related to the evolution of insect segmentation; (Tomoyasu et al., 2009) for insect wing  
122 evolution; and (Angelini et al., 2012; Smith et al., 2014) for the evolution of insect  
123 appendages). However, studies of *cis* properties in *Tribolium* are currently limited due to the  
124 lack of reliable enhancer identification methods.

125 For the initial identification of possible enhancer regions, we first implemented  
126 FAIRE-seq and obtained genome-wide chromatin profiles from various tissues and stages of  
127 *Tribolium*. The comparison of chromatin profiles between different tissues and stages  
128 revealed a distinct set of open chromatin regions in each tissue and stage. Overall, the  
129 *Tribolium* open chromatin characteristics are similar to that of *Drosophila*, however, we also  
130 noticed some features unique to the *Tribolium* chromatin profiles. Comparison of the FAIRE  
131 data to the candidate enhancer regions in the *Tribolium* genome predicated by SCRMshaw  
132 (Supervised Cis-Regulatory Module) (Kantorovitz et al., 2009; Kazemian et al., 2011;  
133 Kazemian et al., 2014) revealed a very high (>75%) overlap between the two datasets. In  
134 addition, we compared the FAIRE profile to the two previously reported enhancer analyses in  
135 *Tribolium* (Cande et al., 2009; Eckert et al., 2004; Kazemian et al., 2014; Wolff et al., 1998),

136 and found that the enhancers identified in these studies match well with the open chromatin  
137 regions detected by FAIRE.

138         Second, we chose the wing expression of *nubbin* (*nub*) as a case study, and sought to  
139 establish a reporter assay system in *Tribolium*. We initially tested the enhancer activity of the  
140 open chromatin regions near the *Tribolium nub* locus in *Drosophila*, and identified a region  
141 ~40kb upstream of the *Tribolium nub* gene that has wing enhancer activity in *Drosophila*.  
142 This region appears to be open uniquely in the wing tissue, thus providing further support for  
143 the ability of FAIRE-seq to identify tissue specific enhancers. In parallel, we also identified  
144 the wing enhancer of the *Drosophila nub* gene. Then, we made several reporter constructs  
145 and tested these constructs in *Tribolium* using the identified *Drosophila* and *Tribolium nub*  
146 wing enhancers. We found that the choice of the core promoter is key in establishing a  
147 functional reporter assay system in *Tribolium*, and that a construct with the *Drosophila*  
148 Synthetic Core Promoter (DSCP) works well in *Tribolium*. This outcome also shows that the  
149 region near the *Tribolium nub* locus with wing enhancer activity in *Drosophila* indeed acts as  
150 a wing enhancer in *Tribolium*. In addition, using *hunchback* (*hb*) as another example, we  
151 demonstrated that our DSCP reporter construct works in other developmental contexts in  
152 *Tribolium*.

153         Taken together, our results demonstrate that FAIRE-based chromatin profiling by  
154 FAIRE-seq, along with the reporter assay system established in this study, is quite powerful at  
155 identifying enhancers, and thus will be useful to study the evolution of *cis*-language in  
156 *Tribolium*. In addition, our approach might be applicable in other insects for investigating  
157 enhancer function and evolution, which will be advantageous for gaining a more  
158 comprehensive understanding of the evolution of *cis*-language.

159

## 160 **RESULTS**

### 161 **FAIRE-seq revealed a spatially and temporally regulated chromatin profile in** 162 **the *Tribolium* genome**

163 To obtain chromatin profiles from diverse tissues and stages of *Tribolium*, we performed  
164 FAIRE-seq with the following six samples; three stages of embryos (0-24 hours, 24-48 hours,  
165 and 48-72 hours), the second (T2) and third thoracic (T3) epidermal tissues of the last instar  
166 larvae that contain the forewing (elytron) and hindwing imaginal tissues, and the brain isolated  
167 from the last instar larvae. The sequence reads obtained from these FAIRE-seq were then  
168 mapped to the *Tribolium* genome assembly (Tcas\_3.0). Each sample displays a unique set of  
169 open chromatin regions (referred to as “peaks”. See Fig. 2A for example), indicating that the  
170 FAIRE-seq with the *Tribolium* tissues was successful. The overall open chromatin  
171 characteristics are similar between *Tribolium* and *Drosophila*, however, we also noticed some  
172 features unique to the *Tribolium* chromatin profiles. We detected more than 40,000 open  
173 chromatin regions in the *Tribolium* genome across the samples (Table 1). To identify  
174 differences in open chromatin profiles between samples, we performed differential peak  
175 calling using DiffBind (FDR < 0.05). The number of differentially accessible peaks between  
176 pairs of samples varied widely. For example, there are over 26,000 differentially accessible  
177 peaks between 0-24 hours embryos and T3 (Table 1, Fig. S1), reflecting the extensive  
178 differences in *cis*-regulatory control that likely exist between these two samples. By contrast,  
179 we found only 4 differentially accessible peaks between T2 and T3. The similarity in open  
180 chromatin profiles between T2 and T3 tissues is remarkable given the dramatic differences in  
181 morphology between forewing and hindwing in *Tribolium*. However, similar findings were  
182 obtained in *Drosophila*, suggesting that both species utilize shared sets of enhancers to shape  
183 their appendages. Intriguingly, while the level of nucleosome depletion in the FAIRE-isolated  
184 genomic regions is variable between stages and tissues, their positions appear to highly



185 correlate with GC-rich regions of the genome (Fig. S2 A). Furthermore, these  
186 GC-rich/FAIRE-identified regions occur with a regular interval, producing a “ruler-like”  
187 pattern of FAIRE peaks throughout the genome (Fig. S2 B). This regular periodicity of the  
188 GC-rich/FAIRE-identified regions appears to be unique to the *Tribolium* lineage, as we did not  
189 detect a similar periodicity in other coleopteran genomes or the genome of a lepidopteran,  
190 *Bombyx mori* (Fig. S2 C for *Drosophila*. Data not shown for other insects).

191

### 192 **Comparison of the FAIRE data to previous enhancer studies in *Tribolium***

193 There are several previous works investigating the activity of *Tribolium* enhancers. To our  
194 knowledge, Eckert et al. is the only study analyzing enhancer activity in the *Tribolium* native  
195 context, which identified enhancers important for the stripe expression of the *Tribolium hairy*  
196 gene (Eckert et al., 2004). Some additional enhancers for *Tribolium* genes have also been  
197 identified, albeit in a cross-species context (i.e. *Drosophila*). These include enhancers for  
198 *hunchback* (Wolff et al., 1998), *single-minded*, *cactus* and *short gastrulation* (Cande et al.,  
199 2009), *labial*, *Dichaete*, and *wingless* (Kazemian et al., 2014). We analyzed the FAIRE profiles  
200 at these gene loci and found that FAIRE peaks match with many of the enhancer regions  
201 identified through these studies (Fig. S3).

202 More recently, Kazemian et al. applied their enhancer discovery approach, SCRMshaw, to  
203 the *Tribolium* genome and predicted 1214 genomic regions as potential enhancers (Kantorovitz  
204 et al., 2009; Kazemian et al., 2014). Comparison of the FAIRE data to the SCRMshaw  
205 predictions reveals a striking degree of overlap between the two datasets: 78.8% (957/1214)  
206 of SCRMshaw predictions overlap at least one embryonic FAIRE peak, while 88.1%  
207 (1070/1214) of predictions overlap at least one larval FAIRE peak (Table. S1, S2;  $P \approx 0$ );  
208 overall, 1096 of the 1214 predicted CRMs (90.3%) overlap at least one FAIRE peak. For  
209 certain sets of SCRMshaw predictions, the overlaps are even more extensive: for example,

210 98% (97/99) of wing-specific predicted CREs overlap a larval FAIRE peak (Table. S1).  
211 Taken together, the high degree of overlap between the FAIRE peaks and previously identified  
212 enhancer regions, and FAIRE-peaks and SCRMshaw-predicted CREs, verifies that FAIRE-seq  
213 is a powerful tool to identify enhancers in *Tribolium*.

214

## 215 **Identification of the *Tribolium nub* wing enhancer using an inter-species** 216 **reporter assay**

217 As mentioned in the introduction, reporter assays are a time consuming and laborious task,  
218 which makes it difficult to perform in non-*Drosophila* insects, including *Tribolium*. However,  
219 to be able to fully exploit the benefit of the FAIRE profiling data, it will be critical to have a  
220 reliable method to evaluate the function of *Tribolium* enhancers. The activity of some  
221 potential *Tribolium* enhancers has been successfully evaluated via a reporter assay in  
222 *Drosophila* (Cande et al., 2009; Kazemian et al., 2014; Wolff et al., 1998; Zinzen et al., 2006).  
223 We reasoned that the enhancer of a gene that has a conserved expression pattern (both  
224 temporal and spatial) between *Drosophila* and *Tribolium* has the highest chance of being  
225 active, even in an inter-species context, and is thus ideal for a case study. The enhancer  
226 responsible for the wing expression of *nub* fits this criterion, as *nub* is expressed broadly in  
227 the tissues that give rise to wings in both insects (Fig. 1) (Ng et al., 1995; Tomoyasu et al.,  
228 2009). In addition, there is an enhancer trap line for *nub* available in *Tribolium* (*pu11*. Fig. 1C,  
229 D). We have previously determined that this enhancer trap line has a piggyBac construct  
230 inserted about 30kb upstream of the *nub* transcription start site (Clark-Hachtel et al., 2013),  
231 which can be used as a starting point to survey for the wing enhancer.

232 *nub* codes for an evolutionarily conserved transcription factor important for the  
233 proliferation of wing cells (Ng et al., 1995). *Drosophila* has two *nub* paralogs (*nub* and *pdm2*),  
234 while *Tribolium* has one (*Tc-nub*). FAIRE analysis has revealed a number of open chromatin

235 regions located in and near the *Tc-nub* locus (Fig. 2A). Some of the open chromatin regions  
236 are shared across the six samples tested (such as the region corresponding to the promoter),  
237 but others are unique to specific tissues and stages. We decided to test the two open  
238 chromatin regions at or near the *pull* insertion site (*Tc-nub3* and *Tc-nub2*) in *Drosophila* (Fig.  
239 2A, B). In addition, we also tested another major open chromatin region located further  
240 upstream of the *pull* insertion site (*Tc-nub1*). This region is open predominantly in the larval  
241 T2 and T3 epidermal tissues (containing the future wing tissues) but not in any of the  
242 embryonic samples, suggesting the possibility that this region contains enhancers specific to  
243 the post-embryonic stage (Fig. 2A, B).

244 The inter-species reporter assay showed that *Tc-nub2* and *Tc-nub3* do not have  
245 enhancer activity in the future wing-related tissues (wing and haltere imaginal discs) when  
246 tested in *Drosophila* (Fig. 2C-F). *Tc-nub3* showed activity in a small region near the hinge of  
247 the wing and haltere disc, but not in the region that gives rise to the wings (wing and haltere  
248 pouches) (Fig. 2C, D). *Tc-nub2* drove the reporter expression in the leg discs, but did not  
249 show any enhancer activity in the wing and haltere discs (Fig. 2E, F). In contrast, *Tc-nub1*  
250 showed significant enhancer activity in the pouch region of the wing disc (Fig. 2G). *Tc-nub1*  
251 also drove reporter expression in the leg disc, but was not active in the haltere disc (Fig. 2H).  
252 Since *Tc-nub1* corresponds to the region uniquely open in the larval epidermis in *Tribolium*,  
253 the outcome of our inter-species reporter assay indicates that (i) the open chromatin profiling  
254 of various tissues and stages by FAIRE-seq in *Tribolium* can help predict tissue/stage specific  
255 enhancers from the *Tribolium* genome, and (ii) the inter-species reporter assay can be useful,  
256 at least for the enhancers responsible for the post-embryonic expression of *nub* in *Tribolium*.

257 We next sought to minimize the *Tc-nub* wing enhancer by testing three shorter  
258 fragments within the *Tc-nub1* region (Fig. 2B). Interestingly, despite covering the main  
259 FAIRE peak region of *Tc-nub1*, *Tc-nub1Core* did not show any enhancer activity in the wing

260 (Fig. 2K, L). Instead, *Tc-nub1L*, which corresponds to only a part of the major open  
261 chromatin region, drove the reporter expression with a pattern and level almost identical to  
262 *Tc-nub1* (Fig. 2I, J). *Tc-nub1R* did not show any enhancer activity (Fig. 2M, N). These results  
263 suggest that the important elements for driving wing expression reside within the first 200bp  
264 of *Tc-nub1*. We tested this idea by making a reporter construct using only the 200bp region  
265 unique to *Tc-nub1L* (*Tc-nub1La*, Fig. 2B). This fragment drove the reporter expression in the  
266 wing and leg discs, albeit with a more restricted expression domain and/or a lower expression  
267 level compared to *Tc-nub1L* (Fig. 2O, P). We also tested a construct that contains the  
268 *Tc-nub1L* region along with an additional 200bp sequence outside of *Tc-nub1* (*Tc-nub1Lb* in  
269 Fig. 2B), since the location of the functional *Tc-nub* wing enhancer may be slightly  
270 misaligned with the open chromatin region predicted by FAIRE. However, *Tc-nub1Lb*  
271 showed even weaker enhancer activity (Fig. 2Q, R), suggesting that there might be a  
272 suppressor element next to the *Tc-nub1* region. The constructs we made also drove reporter  
273 expression outside of the wing and leg imaginal disc. These results are summarized in Table  
274 S3.

275

276 **Identification of the *Drosophila nub* wing enhancer using a combination of**  
277 **genomic resources, FAIRE profiling, and the reporter assay approach in**  
278 ***Drosophila***

279 As a comparison to the enhancer identified via an inter-species reporter assay  
280 described above, we sought to identify the *nub* wing enhancer native to the species used for  
281 the reporter assay (i.e. *Drosophila*). As mentioned, there are two *nub* paralogs in *Drosophila*  
282 (*nub* and *pdm2*), both of which have similar expression in the wing pouch (Ng et al., 1995).  
283 We first took advantage of the FlyLight project and surveyed the *nub* and *pdm2* loci for a  
284 genomic region that has wing enhancer activity. Among the 33 constructs tested in FlyLight

285 (Fig. 3A), one region (GMR11F02) has a record of enhancer activity in the wing and haltere  
286 pouch, along with additional expression in the leg disc (Fig. 3B, C). We then utilized the  
287 previously published FAIRE profile for *Drosophila* (McKay and Lieb, 2013), and identified  
288 three distinct regions within GMR11F02 that are open in the wing and haltere discs (Fig. 3A).  
289 We cloned these three regions (Fig. 3B, *Dm-nub1*, *Dm-nub2*, and *Dm-nub3*), and tested their  
290 enhancer activity in *Drosophila*. Among the three regions, *Dm-nub2* displayed strong  
291 enhancer activity in the wing pouch region (Fig. 3G, H). *Dm-nub1* (Fig3E, F) and *Dm-nub3*  
292 (Fig3I, J) did not drive reporter expression in the wing and haltere discs. In addition,  
293 *Dm-nub3* was active in the leg disc, suggesting that the *nub* wing/haltere enhancer and the leg  
294 enhancer are separable (Fig. 3J). To further minimize the *Dm-nub* wing enhancer, we tested  
295 three shorter fragments within *Dm-nub2* (*Dm-nub2a*, *Dm-nub2b*, and *Dm-nub2c*. Fig. 3D).  
296 The wing related expression is driven by *Dm-nub2a*, albeit at a weaker level (Fig. 3K, L).  
297 This suggests that, although *Dm-nub2a* contains sufficient components to drive wing  
298 expression, a broader genomic region is required for robust wing expression of *Dm-nub*. In  
299 contrast, *Dm-nub2b* and *Dm-nub2c* did not drive any expression (Fig. 3M-P). The expression  
300 patterns of these constructs in other tissues are summarized in Table S4. Taken together, the  
301 *Dm-nub2* region we isolated (1.3kb) is sufficient to drive a robust wing expression in  
302 *Drosophila*.

303

### 304 **Establishing a reporter assay system and evaluating the *nub* wing enhancers in** 305 ***Tribolium***

306 Although some *Tribolium* enhancers were shown to be active in the cross-species context,  
307 these enhancers still need to be examined in their native species for functional validation.  
308 However, the lack of a reliable reporter construct has been a major obstacle in performing  
309 functional evaluation of enhancers in *Tribolium*. The GATEWAY system (Katzen, 2007) has

310 been useful in quickly cloning genomic regions into a reporter construct and testing their  
311 enhancer activity in *Drosophila*. We sought to establish a GATEWAY compatible reporter  
312 construct that is functional in *Tribolium*.

313 A key issue in establishing a reporter construct is the choice of promoters. Previous  
314 studies have raised concerns about using *Drosophila* promoters in *Tribolium* (Schinko et al.,  
315 2010). While establishing the Gal4/UAS system in *Tribolium*, Schinko et al. found that the  
316 core promoter isolated from a *Tribolium* endogenous gene, *Tc-hsp68*, worked more efficiently  
317 when compared to the exogenous promoters that were tested (Schinko et al., 2010). We  
318 therefore made a GATEWAY compatible piggyBac construct that contains the *Tc-hsp68* core  
319 promoter driving the *dsRed* gene (piggyGHR, Fig. 4A). In addition, we added the *gypsy*  
320 element, a *Drosophila* insulator, flanking the reporter assay construct to prevent position  
321 effects (Fig. 4A). We tested this piggyBac construct with the *Tribolium* and *Drosophila nub*  
322 wing enhancers (*Tc-nub1L* and *Dm-nub2*) in *Drosophila*. Both *Tc-nub1L* and *Dm-nub2* drove  
323 dsRed expression identical to the patterns obtained with the *Drosophila* reporter construct  
324 (compare Fig. 4B, C to Fig. 2I, J, and Fig. 4D, E to Fig. 3G, H), confirming that piggyGHR is  
325 functional. However, neither *Tc-nub1L* or *Dm-nub2* in piggyGHR showed consistent  
326 enhancer activity in the wing tissues when transformed into *Tribolium* (Fig. 4F-M). Among  
327 the seven independent transgenic lines obtained for piggyGHR-*Tc-nub1L*, none of them had  
328 clear dsRed expression in the wing tissues (Fig. 4F-K). Instead, four lines had dsRed  
329 expression in non-wing tissues, with a distinct pattern in each line, likely due to trapping  
330 local enhancers (Fig. 4F-K). We obtained only two independent transgenic lines for  
331 piggyGHR-*Dm-nub2*, neither of which had dsRed expression in the wing tissue (Fig. 4L, M).  
332 These results indicate that our construct with the *Tc-hsp68* core promoter does not work well  
333 for reporter assays, at least in the wing related tissues in *Tribolium*, although it does work in  
334 *Drosophila*. Alternatively, it is also possible that the *Drosophila gypsy* insulators we added to

335 the construct might not be functioning properly in *Tribolium*.

336 We next tested a synthetic promoter in *Tribolium*. Pfeiffer et al. modified the Super  
337 Core Promoter 1 (SCP1) (Juven-Gershon et al., 2006) and constructed the *Drosophila*  
338 Synthetic Core Promoter (DSCP), which was used for the FlyLight project as well as other  
339 *Drosophila* reporter constructs including pFUGG used in this study (McKay and Lieb, 2013).  
340 We made a piggyBac construct with the DSCP driving mCherry (piggyGUM, Fig. 5A). We  
341 decided to remove the *Drosophila gypsy* insulators from our construct to avoid possible  
342 inter-species issues. Similar to piggyGHR, piggyGUM with the *Drosophila* and *Tribolium*  
343 *nub* wing enhancers drove reporter expression in the wing disc in *Drosophila* (Fig. 5B-E),  
344 confirming that piggyGUM is functional. In *Tribolium*, in contrast to the piggyGHR  
345 constructs, piggyGUM-*Tc-nub1L* successfully recaptured the expression pattern of the *nub*  
346 enhancer trap line (*pull*) and drove reporter expression in the wing related tissues (both in T2  
347 and T3) at both larval and pupal stages (Fig. 5F-I, compared to Fig. 1C, D).  
348 piggyGUM-*Dm-nub2* also showed enhancer activity in the larval wing discs in *Tribolium*  
349 (Fig. 5J-L). The expression driven by *Dm-nub2* in *Tribolium* was mostly in the wing hinge  
350 and the margin regions, similar to the pattern observed for this enhancer in the *Drosophila*  
351 imaginal discs (Fig. 3G, H, Fig. 5D, E). These results indicate that (i) our GATEWAY  
352 compatible DSCP piggyBac construct (piggyGUM) can be used for reporter assays both in  
353 *Tribolium* and *Drosophila*, and (ii) the *Tribolium nub* wing enhancer identified through an  
354 inter-species reporter assay (*Tc-nub1L*) is indeed functional as a wing enhancer in *Tribolium*.  
355 It is also worth mentioning that some of the piggyGUM transgenic lines showed mCherry  
356 expression in tissues outside of wings (data not shown). The expression patterns outside of  
357 the wing related tissues were not consistent among the transgenic lines, suggesting that the  
358 piggyGUM construct also occasionally traps endogenous enhancers.

359 We also tested if the promoter endogenous to the enhancer works better for a reporter

360 assay construct in *Tribolium*. We made a piggyBac construct with the 2kb sequence upstream  
361 of the *Tc-nub* transcription start site (confirmed by 5' RACE (Clark-Hachtel et al., 2013)) as  
362 the promoter (Fig. 6A, piggyNub-proR). We also used the 2kb downstream of the *Tc-nub* stop  
363 codon (confirmed by 3' RACE (Clark-Hachtel et al., 2013)) as the 3' untranslated region  
364 (UTR) and the poly A signal native to *Tc-nub* (Fig. 6A). We made a similar construct for  
365 Tc-Act5c (1kb upstream of the transcription start site and 1kb downstream of the stop codon  
366 as the native promoter and polyA signal, respectively) as a comparison (Fig. 6B). To our  
367 surprise, *Tc-nub1L* in piggyNub-proR did not drive any expression in *Tribolium* (Fig. 6C-F)  
368 or in *Drosophila* (Fig. 6G, H). Realtime-qPCR analysis revealed that there is no transcription  
369 of dsRed in these transgenic lines in both species (data not shown), suggesting that the lack of  
370 reporter expression is not due to incompatibility of the reporter gene with the *Tc-nub* UTRs  
371 and is rather due to the *nub* wing enhancer failing to work with the endogenous promoter  
372 and/or polyA signal. In contrast to piggyNub-proR- *Tc-nub1L*, piggyAct5cR shows strong  
373 and ubiquitous dsRed expression in *Tribolium* (Fig. 6I), indicating that our strategy of  
374 incorporating the endogenous transcription and translation components is valid. Intriguingly,  
375 however, piggyAct5cR did not drive any expression in *Drosophila* (data not shown),  
376 implying a strict species specific nature of the transcription and/or translation components  
377 (such as promoters), even for an evolutionarily highly conserved house-keeping gene that is  
378 uniformly expressed in various species including *Drosophila* and *Tribolium* (Chung and  
379 Keller, 1990).

380

### 381 **Testing the reporter construct in another context in *Tribolium***

382 We next wondered if our DSCP reporter system works in a context other than wings in  
383 *Tribolium*. We chose *hb* as a case study, and tested the reporter activity during embryogenesis.  
384 *hb* expression in *Tribolium* starts as a broad posterior domain in the blastoderm and clears



385 from posterior to form an anterior band of expression that covers pre-gnathal and gnathal  
386 segments (Lynch et al., 2012; Marques-Souza et al., 2008). In the early germband stage, the  
387 band resolves into a stripe covering the labium (Fig. 7B) (Marques-Souza, 2007; Zhu et al.,  
388 2017). Wolff et al. previously identified a genomic region at the *Tribolium hb* locus that  
389 drives blastoderm expression when introduced in *Drosophila* (Fig. 7A, orange bar) (Wolff et  
390 al., 1998). This region corresponds to a SCRMshaw prediction (Fig. 7A, purple bars).  
391 Therefore, although the FAIRE signal at this region is weak (likely due to the wide time  
392 window of sampling during early embryogenesis), the outcomes of previous studies make  
393 this region an excellent candidate enhancer to test with our reporter system in *Tribolium*. We  
394 cloned a 1340bp fragment containing this genomic region (*hb*-PE1, Fig. 7A, red bar), and  
395 tested its enhancer activity using the piggyGUM construct in *Tribolium*. *in situ* hybridization  
396 for the *mCherry* reporter gene revealed that the piggyGUM-PE1 construct recapitulates the  
397 *hb* expression at the early germband stage in *Tribolium* (Fig. 7C). This result indicates that (i)  
398 our DSCP reporter system works well even during embryogenesis in *Tribolium*, and (ii)  
399 *hb*-PE1 contains the *hb* early germband enhancer.

400 In summary, we established a functional reporter assay system that works in diverse  
401 developmental contexts in *Tribolium* and also successfully identified the enhancers  
402 responsible for wing expression of *nub* and early germband expression of *hb*. Furthermore,  
403 our reporter construct (piggyGUM) is compatible in both *Drosophila* and *Tribolium*,  
404 implying that this reporter construct may be applicable even to other insect species.

## 405 **DISCUSSION**

406 In this study, we demonstrated that FAIRE-based chromatin profiling is a powerful approach  
407 for identifying CREs, such as enhancers, in *Tribolium*. The *Tribolium nub* wing enhancer we  
408 identified (*Tc-nub1L*) is over 40kb away from the *nub* transcription start site, and 10kb away  
409 from the *pull* insertion site, which would be very difficult to identify without the aid of open  
410 chromatin profiles. In addition, with the usage of the DSCP, we were able to establish a  
411 functional reporter assay construct in *Tribolium*. Combination of FAIRE-based chromatin  
412 profiling with this reporter assay system will allow us to assess the function and evolution of  
413 enhancers in *Tribolium*.

414

### 415 **FAIRE profiles in *Tribolium***

416 Genome-wide FAIRE profiling in *Tribolium* has identified a significant number of genomic  
417 regions whose chromatin status is regulated in a tissue and stage specific manner (Table 1, Fig.  
418 S1). These regions are promising candidates for future enhancer studies in *Tribolium*. In  
419 addition, our FAIRE analysis has revealed both evolutionarily conserved and diverged aspects  
420 of chromatin state regulation between *Drosophila* and *Tribolium*. For the conserved aspect, we  
421 saw similar chromatin profiles for the T2 and T3 epidermal samples, even though these two  
422 tissues differentiate into morphologically distinct structures (the elytron in T2 and hindwing in  
423 T3). This outcome echoes the message obtained from the *Drosophila* FAIRE study, namely  
424 that chromatin profiles are largely similar among the similar lineages of tissues (such as legs,  
425 wings, and halteres), with the exception of a handful of “master control gene” loci (McKay and  
426 Lieb, 2013). In fact, three of the four differentially-open FAIRE peaks between T2 and T3 in  
427 our *Tribolium* FAIRE analysis are within the *Ultrabithorax* (the T3 selector gene) locus (Fig.  
428 S1) (to review the function of *Ultrabithorax* during wing development, see (Tomoyasu, 2017)).  
429 In contrast, the *Tribolium* FAIRE profiles during embryogenesis show an interesting difference

430 when compared to those in *Drosophila*. In *Drosophila*, the number of genomic regions that are  
431 open is fairly consistent throughout embryogenesis, with a distinct set of genomic regions  
432 being open in each stage (McKay and Lieb, 2013). In *Tribolium*, we noticed that a larger  
433 number of chromatin regions are open early in embryogenesis, and some of these regions are  
434 subsequently closed, resulting in a smaller number of open chromatin regions in later stages.  
435 This difference may be a reflection of the different modes of embryogenesis found in the two  
436 insects (long vs. short germ band embryogenesis), although the significance of the difference  
437 in chromatin profiles is yet to be investigated.

438 We also noticed a strict overlap between the GC-rich regions and FAIRE-detected open  
439 chromatin regions. This raises an interesting argument about the evolution of enhancers. Are  
440 these regions open because they are functionally important (such as enhancers)? Or, have these  
441 regions become enhancers, because they were open due to a bias in their nucleotide content and  
442 thus accessible to transcription factors? There appears to be a similar correlation among the  
443 GC-rich regions, enhancers, and FAIRE peaks in *Drosophila* (Li et al., 2007; McKay and Lieb,  
444 2013). It will be interesting to investigate how GC-rich regions overlap with open chromatin  
445 regions in other insects. In addition, we found that the GC-rich/FAIRE-positive regions appear  
446 in a regular interval throughout the *Tribolium* genome. The molecular basis and functional  
447 implication of this periodicity is currently unknown, however, it is intriguing to speculate that a  
448 genome-wide event (such as transposon invasion) might have significantly influenced the  
449 chromatin state landscape in the *Tribolium* lineage.

450

#### 451 **Overlaps between FAIRE and SCRMshaw enhancer prediction**

452 The high degree of overlap observed between FAIRE peaks and enhancers predicted by the  
453 completely different, solely computational, SCRMshaw method provides further  
454 confirmation that FAIRE is an effective means for enhancer discovery in *Tribolium*. Overall,

455 the number of FAIRE peaks is well in excess of the number of SCRMshaw predictions.  
456 Several factors likely account for this result. First, the SCRMshaw predictions were  
457 performed at high stringency in order to minimize potential false-positive results (Kazemian  
458 et al., 2014); relaxing the prediction criteria would yield more predicted enhancers. While this  
459 would potentially lead to more false positives, the >90% overlap seen for several specific  
460 data sets (Table S1) suggests that stringency could be relaxed in at least some cases. Second,  
461 SCRMshaw relies on training data from known *Drosophila* enhancers; therefore enhancers  
462 with properties significantly deviating from those of *Drosophila* enhancers will be found only  
463 by chromatin profiling, such as FAIRE. Finally, although FAIRE appears to be biased toward  
464 enhancers (Song et al., 2011), it also identifies other regions of open chromatin such as  
465 promoters and insulator regions (Giresi et al., 2007), which are not predicted by the  
466 enhancer-specific SCRMshaw.

467         The twin issues of higher SCRMshaw false-positive rates at lower prediction  
468 stringencies and FAIRE's lack of discrimination with respect to enhancers with specific  
469 spatial and temporal activity profiles suggest that considerable advantages could be obtained  
470 by using the methods in combination. Overlap with FAIRE peaks can be used to filter out  
471 false-positive SCRMshaw predictions, allowing predictions to be performed at lower  
472 stringency and thus higher sensitivity. Conversely, SCRMshaw prediction can be used to  
473 focus on potentially more relevant FAIRE peaks, helping to avoid selecting sequences  
474 representing enhancers active in tissues other than the one of interest; enhancers for a  
475 neighboring housekeeping gene; insulators; and cryptic promoters or those for unannotated  
476 genes. This will be particularly useful for situations like the one seen here for the larval  
477 samples, where cleanly separating wing from body wall tissue was difficult, a common  
478 challenge when attempting to isolate tissues from small organisms such as insect embryos.  
479

480 **Enhancer activity in inter-species contexts and the limitation of non-native**  
481 **reporter assays**

482 Our reporter assays in two insect species showed that both *Drosophila* and *Tribolium nub*  
483 wing enhancers were at least partially active in the inter-species context. We identified a  
484 20-bp sequence shared between the two enhancers that contains binding sites of some  
485 wing-related transcription factors (such as Brinker and Mad) (Fig. S4). However, deletion of  
486 this sequence did not influence the activity of these enhancers when tested in *Drosophila*,  
487 indicating that this sequence is dispensable for enhancer function (Fig. S4). We did not  
488 recognize any other significant sequence similarity or a conserved TF-binding site  
489 architecture between the two enhancers, suggesting that the regulatory landscape in the wing  
490 of the two species is evolutionarily maintained (as the *nub* enhancers can be functional in  
491 inter-species contexts) despite the lack of noticeable sequence conservation in the enhancer  
492 itself. A thorough examination of *trans* properties that regulate the *nub* wing enhancers may  
493 give us insights into how enhancers evolve under a conserved regulatory landscape.

494 Although the *Tribolium* wing enhancer was active in *Drosophila*, we noticed that the  
495 activity of this enhancer was somewhat restricted, as it was active mainly at the dorsal-ventral  
496 (DV) compartmental boundary of the T2 wing, and only in a few cells in the haltere. This is  
497 in contrast with the expression in *Tribolium*, which showed a broader activity domain in the  
498 entire wing tissues both in the T2 and T3 segments. These differences in the activity domains  
499 suggest that some components that regulate the *Tribolium nub* wing enhancer are missing  
500 from the *Drosophila* T2 wing and almost entirely absent in the haltere. This highlights the  
501 limitation of inter-species analyses and the importance of performing reporter assays in the  
502 native species. The reporter assay system we developed now allows us to analyze enhancer  
503 activities in *Tribolium*. The successful demonstration of reporter analyses for *nub* in the wing  
504 and *hb* in the embryo suggest that our reporter construct works in various tissues; however, it

505 is still crucial to evaluate the applicability of this system in diverse contexts.

506

### 507 **Choice of core promoters in reporter constructs**

508 Our study showed that the choice of promoters is critical when assessing enhancer activity.

509 *Tc-hsp68* was our first choice because it has successfully been used in the Gal4/UAS system

510 in *Tribolium* (Schinko et al., 2010). However, in our reporter assay, although this promoter

511 worked efficiently in *Drosophila*, it failed to drive reporter expression even with a functional

512 enhancer in *Tribolium* (at least in our hands). Interestingly, the transgenic beetles with the

513 *Tc-hsp68* reporter construct showed high occurrence of enhancer trap events (Fig. 4F-M),

514 even though this promoter failed to work with the enhancer we placed right upstream of it.

515 One explanation is that this promoter requires a certain distance for optimal interaction with

516 enhancers in *Tribolium*. The situation might be less strict in *Drosophila* (for an unknown

517 reason), allowing the *Tc-hsp68* promoter to overcome the distance requirement.

518 We also tried to assess the *nub* wing enhancer activity with the *nub* endogenous

519 promoter, but to our surprise, this construct did not drive any expression. There are several

520 possible explanations for this outcome. First, the region we selected might not contain the

521 correct promoter for the *nub* transcript, although our 5' RACE results (as well as the

522 published *Tribolium* genome annotation (Tribolium Genome Sequencing et al., 2008))

523 supports our annotation of the *nub* transcription start site (Clark-Hachtel et al., 2013). Second,

524 the 2kb region we used as the promoter may contain a suppressor element, interfering with

525 the enhancer to drive reporter expression. Third, the *nub* promoter might require a long

526 distance to interact properly with the wing enhancer, as the wing enhancer we identified is

527 40kb away from the *nub* transcription start site. This might parallel the situation with

528 *Tc-hsp68*, in which this promoter preferably works with enhancers located at a certain

529 distance. This may further support the idea that *Drosophila* are more permissive to changes in

530 the enhancer/promoter distance. However, in the case of the *nub* endogenous promoter, there  
531 might be additional issues other than enhancer/promoter distance that prevented this reporter  
532 construct from working even in *Drosophila*.

533 The reporter construct with the DSCP (piggyGUM) worked efficiently both in  
534 *Drosophila* and *Tribolium*. The DCSP is a synthetic core promoter, composed of several  
535 common core promoter motifs (i.e. TATA box, Inr, MTE, and DPE) isolated from the  
536 *Drosophila* genome. The DSCP has been shown to work efficiently with a diverse array of  
537 developmental enhancers in various contexts in *Drosophila* (Pfeiffer et al., 2008; Zabidi et al.,  
538 2015), suggesting that this promoter may also work well with other enhancers in *Tribolium*.  
539 However, it is worth mentioning that a synthetic promoter similar to the DCSP, SCP1  
540 (composed of *Drosophila* and viral promoter motifs (Juven-Gershon et al., 2006)), failed to  
541 work when tested in the Gal4/UAS system in *Tribolium* (Schinko et al., 2010). This again  
542 emphasizes the importance of choosing the correct promoter that fits the context of the study,  
543 which remains a critical area for further exploration.

544

#### 545 **Enhancer studies in evo-devo**

546 The study of enhancers and other CREs is critical to understand the molecular basis  
547 underlying morphological evolution, as changes in gene regulation, rather than the  
548 acquisition of new genes or the modification of protein structures, are often responsible for  
549 the evolution of the diverse array of morphology (Carroll, 2008). For example, changes in  
550 enhancers can facilitate evolution of novel structures via co-opting preexisting GRNs into a  
551 new context. Acquisition of enhancers *de novo* may also play a critical role in morphological  
552 novelty. Therefore, studying both evolutionarily conserved and diverged enhancers will help  
553 further our understanding of morphological evolution (see (Monteiro and Podlaha, 2009) for  
554 a comprehensive discussion of how *cis* studies can help elucidate the molecular basis for the

555 evolution of novel traits) . However, it has been a challenge to study enhancers in  
556 non-traditional model insects due to the lack of a reliable enhancer identification strategy. In  
557 this study, we showed that FAIRE-seq is readily applicable to non-traditional model species.  
558 Furthermore, the DSCP can be a useful promoter for establishing a reporter assay system and  
559 investigating the evolution of enhancers in non-*Drosophila* insects. Therefore, FAIRE-based  
560 chromatin profiling, along with reporter assay systems applicable to various insects, will  
561 make the research on enhancers more accessible, which will provide us with more insights  
562 into the evolution of the regulatory mechanisms underlying morphological diversity.  
563



## 564 MATERIALS AND METHODS

### 565 Fly stocks

566 The following two *Drosophila* strains used in this study were obtained from the Bloomington  
567 *Drosophila* Stock center.

568  $P\{UAS-Dcr-2.D\}^l, w^{1118}; P\{GawB\} nubbin-AC-62$

569  $y^l w^*; wg^{Sp-1}/CyO, P\{Wee-P.ph0\}Bacc^{Wee-P20}; P\{20XUAS-6XGFP\}attP2.$

570

### 571 Beetle cultures

572 The beetle cultures were reared on whole wheat flour (+5% yeast) at 30 °C in a temperature and  
573 humidity controlled incubator. The *nub* enhancer trap line *pull1*, which has enhanced yellow  
574 fluorescent protein (EYFP) expression in the hindwing and elytron discs (Clark-Hachtel et al.,  
575 2013; Lorenzen et al., 2003; Tomoyasu et al., 2005), was used as to monitor *nub* expression in  
576 *Tribolium*.

577

### 578 Tissue preparation for FAIRE

579 For the *Tribolium* larval T2 and T3 wing tissues, the dorso-lateral portion of the epidermal  
580 tissues that contain elytron (T2) and hindwing (T3) discs were dissected from the last instar  
581 larvae. Although these samples largely consisted of tissues that give rise to wing structures,  
582 they also contained body wall tissues as well as larval muscles due to difficulty of precisely  
583 dissecting the wing tissues from larvae. About 50 larvae (100 dissected tissues) were used for  
584 each biological replicate, with three replicates prepared for each wing sample. The brains  
585 were dissected from the head of the last instar larvae. About 40 brains were used for each  
586 biological replicate, with two replicates prepared. Embryos were collected in whole wheat  
587 flour (+5% yeast) for 24 hours at 30 °C. The collected embryos were cultured for one and two  
588 days at 30 °C for the 24-48 hour and 48-72 hour samples, respectively. 0.1g of embryos were

589 used for each biological replicate, with three replicates prepared for each sample. These  
590 tissues and embryos were crosslinked with 4% formaldehyde for 30 min (larval tissues) or  
591 8% formaldehyde for 30 min (embryos).

592

### 593 **FAIRE-seq analysis**

594 FAIRE was performed as previously described (McKay and Lieb, 2013). FAIRE-seq libraries  
595 were sequenced on an Illumina HiSeq 2000 at the University of North Carolina  
596 High-Throughput Sequencing Facility. 50bp single-end Illumina reads were obtained for  
597 FAIRE-treated samples and two non-FAIRE-treated input samples. Reads were trimmed to  
598 remove index sequence and mapped to the *Tribolium* reference genome (version 3.0) with  
599 bowtie2 (Langmead and Salzberg, 2012). Read alignments were quality filtered (Q<10  
600 dropped) and duplicate reads were removed using SAMtools. For visualization of FAIRE  
601 signal, bigwig files were produced by merging tissue/stage-specific replicate bam files with  
602 SAMtools and normalizing reads to sequencing depth using deepTools. These files were then  
603 visualized with the IGV genome viewer (Robinson et al., 2011; Thorvaldsdóttir et al., 2013).  
604 Peaks were called on individual replicates using MACS2 with the merged input sample bam  
605 files as the control. The *Drosophila* FAIRE profiles used in this study were previously  
606 published (McKay and Lieb, 2013). For differentially open peak analysis, mapped reads (.bam  
607 files) for each replicate and the merged input, along with MACS2 peaks (.narrowPeak files)  
608 called for each replicate, were provided as input for DiffBind. DiffBind creates a consensus  
609 peakset for all replicates provided, requiring a consensus peak to be present in at least 2  
610 replicates of 1 sample. An experiment-wide consensus peakset was produced using all samples.  
611 Pairwise analysis of differentially open peaks between samples was performed within DiffBind  
612 with the DESeq2 method for all consensus peaksets, and plotted using the `dba.plotMA()`  
613 function. The differentially open peaks are listed in Table S6.

614

## 615 **Genome-wide GC-contents analysis**

616 Using the experiment-wide consensus peakset described above, 1 kb of sequence upstream and  
617 downstream of each peak center was extracted from the genome using BEDTools (Quinlan and  
618 Hall, 2010) and custom Python scripts. For these 2kb fragments, those free of Ns were  
619 subjected to GC analysis. Changes in local GC content (250bp sliding window, 10bp step)  
620 were plotted against the whole-fragment average of GC content for all fragments. For the  
621 GC-rich region distance analysis, first, bedGraphs of GC content fluctuations above and below  
622 the genome wide average were computed at 70 and 60bp resolution for the *Tribolium* and  
623 *Drosophila* genomes, respectively. The genome of *Bombyx mori*, as well as the genomes of  
624 several coleopteran insects (*Agrilus planipennis*, *Dendroctonus ponderosae*, *Anoplophora*  
625 *glabripennis*, *Leptinotarsa decemlineata*, *Nicrophorus vespilloides*, and *Onthophagus taurus*)  
626 were analyzed at 70bp resolution. Peaks were then called using the bdgcallpeak command in  
627 MACS2. Distance between the edges of adjacent peaks was categorized into 100bp bins and  
628 the ln of the number of occurrences plotted. For the FAIRE peak distance analysis, distances  
629 between FAIRE peaks were collected and plotted in the same manner as the GC peaks. A  
630 consensus *Drosophila* FAIRE peakset was obtained from DiffBind with the same settings as  
631 the *Tribolium* data using the previously published data (McKay and Lieb, 2013).

632

## 633 **Comparison between FAIRE and SCRMshaw**

634 Enhancers predicted by SCRMshaw were taken from Table S4 of Kazemian et al. (Kazemian  
635 et al., 2014) and converted into BED format. BEDTools *merge* was used to combine  
636 overlapping and/or redundant (i.e., from more than one SCRMshaw scoring method)  
637 predictions, reducing the total number of predicted enhancers to 1214. BEDTools *intersect*  
638 was then used to determine all predicted enhancers with at least 50 bp overlap with a FAIRE

639 peak (-f 0.10). FAIRE peaks not assigned to a *Tribolium* chromosome (i.e., not starting with  
640 “ChLG”) were omitted. Significance of overlaps was determined using BEDTools *fisher*; all  
641 overlaps were highly significant with  $-\log(P) \geq 19$ . Because this method provides only an  
642 approximation, a selection of datasets was tested via randomization. BEDTools *shuffle* was  
643 used to generate 1000 random intervals and the intersections were determined as above. The  
644 mean and standard deviation of the randomized intersections were calculated and used with  
645 the observed (SCRMshaw) intersection value to determine a *z* score. *P* values from all  
646 randomization tests were highly significant.

647

#### 648 ***Drosophila* reporter assay constructs**

649 pFUGG, a *Drosophila* GATEWAY-compatible phiC31 transformation plasmid, was used for  
650 reporter assay in *Drosophila* (McKay and Lieb, 2013). The phiC31 system allows site-specific  
651 integration (Bischof et al., 2007), thus preventing position effects due to different insertion  
652 sites. An enhancer cloned into pFUGG will drive Gal4 as the reporter, whose expression  
653 domains will then be visualized by crossing to UAS-EGFP flies.

654

#### 655 **GATEWAY compatible piggyBac reporter constructs**

656 The piggyBac plasmid with the 3xP3-EGFP marker construct and the FseI/AscI cloning site  
657 (Horn and Wimmer, 2000) was used to make all piggyBac constructs used in this study. For  
658 **piggyGHR** (piggyBac GATEWAY Tc-hsp68 dsRed), the *gypsy* element, *Tc-hsp68* core  
659 promoter, *dsRed*, and the SV40 polyA signal were amplified by PCR, assembled through  
660 ligation, and inserted into the FseI/AscI site of the piggyBac plasmid. The assembled plasmid  
661 was then converted to a GATEWAY compatible plasmid by Gateway® Vector Conversion  
662 System (ThermoFisher Science). For **piggyGUM** (piggyBac GATEWAY Universal promoter  
663 mCherry), the reporter construct including the GATEWAY cassette was amplified from a

664 *Drosophila* GATEWAY-compatible phiC31 transformation vector and inserted into the  
665 FseI/AscI site of the piggyBac plasmid. The primers used to make piggyGUM were listed in  
666 Table S5. The reporter constructs in **piggyNub-proR** (*piggyBac nub* promoter dsRed) and  
667 **piggyAct5c-proR** (*piggyBac Act5c* promoter dsRed) were *de novo* synthesized and inserted  
668 into the FseI/AscI site of the piggyBac plasmid.

669

### 670 **Enhancer cloning**

671 Genomic fragments corresponding to possible enhancer regions were PCR amplified and  
672 cloned into pENTR using pENTR-D Directional TOPO Cloning kit (Thermo-Fisher  
673 Scientific, K240020). The primers used to clone the enhancer regions from the *Drosophila*  
674 and *Tribolium* genome are listed in Table S5. Cloned genomic fragments were then inserted  
675 into reporter constructs via GATEWAY Clonase reaction (Thermo-Fisher Scientific,  
676 11791-019).

677

### 678 ***Drosophila* and *Tribolium* transgenesis**

679 For *Drosophila* transgenesis, pFUGG constructs were transformed into the attP2 site (68A4)  
680 through PhiC31 integrase-mediated transgenesis system, and piggyBac constructs were  
681 transformed into *w<sup>1118</sup>* with EGFP as a visible marker (BestGene *Drosophila* transgenic  
682 service). For *Tribolium* transgenesis, piggyBac constructs were transformed into  
683 *vermilion<sup>white</sup>* with EGFP as a visible marker (TriGenES *Tribolium* Genome Editing Service  
684 for the *nub* and *Act5c* constructs, Friedrich-Alexander-Universität Erlangen-Nürnberg for the  
685 *hb* construct).

686

### 687 **Immunohistochemistry and *in situ* hybridization**

688 *Drosophila* imaginal discs were dissected from the third instar larvae and fixed with 4%

689 formaldehyde for 25 min. *Tribolium* elytron and hindwing discs were dissected from the last  
690 instar larvae, and fixed with 4% formaldehyde for 25 min. Dissected tissues were then  
691 washed and blocked with 10% BSA, and incubated with Rabbit anti-mCherry antibody  
692 (1:500; Abcam, ab167453) at 4 °C for overnight. After washing for one hour, the tissues were  
693 incubated with the Alexa 555 conjugated Goat anti-Rabbit antibody (1:500) for 2 hours at  
694 room temperature. All the discs were mounted on glass slides with ProLong® Gold antifade  
695 reagent (Life Technologies) for documentation. *in situ* hybridization was performed as  
696 previously described (Shippy et al., 2009), with DIG-labeled riboprobes and alkaline  
697 phosphatase conjugated anti-DIG antibody (Sigma-Aldrich 11093274910). Signal was  
698 developed using BM Purple (Sigma-Aldrich 11442074001). The primers used to amplify the  
699 *mCherry* fragment for riboprobe synthesis were included in Table S5. The *hb* riboprobe used in  
700 this study is previously described (Wolff et al., 1998).

701

## 702 **Image Processing and Documentation**

703 The images were captured by Zeiss 710 confocal microscope (mounted discs) and Zeiss  
704 AxioCam MRc5 with Zeiss Discovery V12 (*Tribolium* larvae and pupae). A filter set specific  
705 to mCherry (575/50x, 640/50m) was used to visualize the mCherry expression driven by  
706 piggyGUM constructs. *Tribolium* germband embryos were imaged with ProgRes CFcool  
707 camera on Zeiss Axio Scope.A1 microscope using ProgRes CapturePro image acquisition  
708 software. Some pictures were enhanced only for brightness and contrast with Adobe  
709 Photoshop.

710

## 711 **Acknowledgements**

712 We thank the Bloomington Stock Center for fly stocks, and the Center for Bioinformatics and Functional  
713 Genomics (CBFG) and Center for Advanced Microscopy and Imaging (CAMI) at Miami University for  
714 technical support. We also thank Shuxia Yi for technical support, and Courtney Clark-Hachtel, David Linz, and  
715 other members of Tomoyasu lab for helpful discussion.

716

717 **Competing interests**

718 The authors declare no competing or financial interests.

719

720 **Author contributions**

721 Y.T. designed the project. Y-T.L., K.D.D., F.B-C., N.S., K.S., M.S.H., D.J.M., Y.T. performed experiments.

722 Y-T.L., K.D.D., F.B-C., N.S., K.S., M.S.H., D.J.M., Y.T. analyzed the data. Y-T.L., K.D.D., M.S.H, D.J.M, and

723 Y.T., wrote the manuscript.

724

725 **Funding**

726 This project was supported by a National Science Foundation (NSF) grant (IOS0950964 and IOS1557936) to

727 Y.T., USDA grant 2012-67013-19361 to M.S.H., UNC-CH start-up funds to D.J. M.

728

729 **Data availability**

730 FAIRE-seq data have been deposited at Gene Expression Omnibus (GEO) under accession number GSE104495.

731

## 732 REFERENCES

- 733 **Angelini, D. R., Smith, F. W. and Jockusch, E. L.** (2012). Extent With Modification: Leg Patterning in  
734 the Beetle *Tribolium castaneum* and the Evolution of Serial Homologs. *G3* **2**, 235–248.
- 735 **Belles, X.** (2010). Beyond *Drosophila*: RNAi in vivo and functional genomics in insects. *Annu Rev*  
736 *Entomol* **55**, 111–128.
- 737 **Bischof, J., Maeda, R. K., Hediger, M., Karch, F. and Basler, K.** (2007). An optimized transgenesis  
738 system for *Drosophila* using germ-line-specific phiC31 integrases. *Proc. Natl. Acad. Sci. U. S. A.*  
739 **104**, 3312–7.
- 740 **Brown, S. J., Mahaffey, J. P., Lorenzen, M. D., Denell, R. E. and Mahaffey, J. W.** (1999). Using  
741 RNAi to investigate orthologous homeotic gene function during development of distantly related  
742 insects. *Evol Dev* **1**, 11–15.
- 743 **Bucher, G., Scholten, J. and Klingler, M.** (2002). Parental RNAi in *Tribolium* (Coleoptera). *Curr Biol*  
744 **12**, R85–6.
- 745 **Cande, J., Goltsev, Y. and Levine, M. S.** (2009). Conservation of enhancer location in divergent  
746 insects. *Proc. Natl. Acad. Sci.* **106**, 14414–14419.
- 747 **Carroll, S. B.** (2008). Evo-Devo and an Expanding Evolutionary Synthesis: A Genetic Theory of  
748 Morphological Evolution. *Cell* **134**, 25–36.
- 749 **Carroll, S., Grenier, J. K. and Weatherbee, S. D.** (2005). *From DNA to Diversity*. second edi.  
750 Blackwell publishing.
- 751 **Chung, Y. T. and Keller, E. B.** (1990). Positive and negative regulatory elements mediating  
752 transcription from the *Drosophila melanogaster* actin 5C distal promoter. *Mol. Cell. Biol.* **10**,  
753 6172–80.
- 754 **Clark-Hachtel, C. M., Linz, D. M. and Tomoyasu, Y.** (2013). Insights into insect wing origin provided  
755 by functional analysis of vestigial in the red flour beetle, *Tribolium castaneum*. *Proc Natl Acad Sci*  
756 *U S A* **110**, 16951–16956.
- 757 **Denell, R.** (2008). Establishment of *tribolium* as a genetic model system and its early contributions to  
758 evo-devo. *Genetics* **180**, 1779–1786.
- 759 **Eckert, C., Aranda, M., Wolff, C. and Tautz, D.** (2004). Separable stripe enhancer elements for the  
760 pair-rule gene hairy in the beetle *Tribolium*. *EMBO Rep.* **5**, 638–42.
- 761 **Frazer, K. A., Pachter, L., Poliakov, A., Rubin, E. M. and Dubchak, I.** (2004). VISTA: computational  
762 tools for comparative genomics. *Nucleic Acids Res.* **32**, W273–W279.
- 763 **Giresi, P. G., Kim, J., McDaniel, R. M., Iyer, V. R. and Lieb, J. D.** (2007). FAIRE  
764 (Formaldehyde-Assisted Isolation of Regulatory Elements) isolates active regulatory elements  
765 from human chromatin. *Genome Res.* **17**, 877–85.
- 766 **Halfon, M. S.** (2017). Perspectives on Gene Regulatory Network Evolution. *Trends Genet.*
- 767 **Hong, J.-W., Hendrix, D. A. and Levine, M. S.** (2008). Shadow enhancers as a source of evolutionary  
768 novelty. *Science* **321**, 1314.
- 769 **Horn, C. and Wimmer, E. A.** (2000). A versatile vector set for animal transgenesis. *Dev. Genes Evol.*  
770 **210**, 630–7.
- 771 **Jenett, A., Rubin, G. M., Ngo, T.-T. B., Shepherd, D., Murphy, C., Dionne, H., Pfeiffer, B. D.,**  
772 **Cavallaro, A., Hall, D., Jeter, J., et al.** (2012). A GAL4-driver line resource for *Drosophila*  
773 neurobiology. *Cell Rep.* **2**, 991–1001.
- 774 **Jory, A., Estella, C., Giorgianni, M. W., Slattery, M., Laverly, T. R., Rubin, G. M. and Mann, R. S.**  
775 (2012). A survey of 6,300 genomic fragments for cis-regulatory activity in the imaginal discs of  
776 *Drosophila melanogaster*. *Cell Rep.* **2**, 1014–24.
- 777 **Juven-Gershon, T., Cheng, S. and Kadonaga, J. T.** (2006). Rational design of a super core promoter  
778 that enhances gene expression. *Nat. Methods* **3**, 917–22.
- 779 **Kantorovitz, M. R., Kazemian, M., Kinston, S., Miranda-Saavedra, D., Zhu, Q., Robinson, G. E.,**  
780 **Göttgens, B., Halfon, M. S. and Sinha, S.** (2009). Motif-blind, genome-wide discovery of  
781 cis-regulatory modules in *Drosophila* and mouse. *Dev. Cell* **17**, 568–79.
- 782 **Katzen, F.** (2007). Gateway<sup>®</sup> recombinational cloning: a biological operating system. *Expert Opin.*



- 783 *Drug Discov.* **2**, 571–589.
- 784 **Kazemian, M., Zhu, Q., Halfon, M. S. and Sinha, S.** (2011). Improved accuracy of supervised CRM  
785 discovery with interpolated Markov models and cross-species comparison. *Nucleic Acids Res.* **39**,  
786 9463–72.
- 787 **Kazemian, M., Suryamohan, K., Chen, J.-Y., Zhang, Y., Samee, M. A. H., Halfon, M. S. and Sinha,**  
788 **S.** (2014). Evidence for deep regulatory similarities in early developmental programs across  
789 highly diverged insects. *Genome Biol. Evol.* **6**, 2301–20.
- 790 **Kvon, E. Z., Kazmar, T., Stampfel, G., Yáñez-Cuna, J. O., Pagani, M., Schernhuber, K., Dickson, B.**  
791 **J. and Stark, A.** (2014). Genome-scale functional characterization of *Drosophila* developmental  
792 enhancers in vivo. *Nature* **512**, 91–5.
- 793 **Li, L., Zhu, Q., He, X., Sinha, S. and Halfon, M. S.** (2007). Large-scale analysis of transcriptional  
794 cis-regulatory modules reveals both common features and distinct subclasses. *Genome Biol* **8**,  
795 R101.
- 796 **Lorenzen, M. D., Berghammer, A. J., Brown, S. J., Denell, R. E., Klingler, M. and Beeman, R. W.**  
797 (2003). piggyBac-mediated germline transformation in the beetle *Tribolium castaneum*. *Insect*  
798 *Mol Biol* **12**, 433–440.
- 799 **Lynch, J. A., El-Sherif, E. and Brown, S. J.** (2012). Comparisons of the embryonic development of  
800 *Drosophila*, *Nasonia*, and *Tribolium*. *Wiley Interdiscip. Rev. Dev. Biol.* **1**, 16–39.
- 801 **Marques-Souza, H.** (2007). Evolution of the gene regulatory network controlling trunk segmentation in  
802 insects.
- 803 **Marques-Souza, H., Aranda, M. and Tautz, D.** (2008). Delimiting the conserved features of  
804 hunchback function for the trunk organization of insects. *Development* **135**, 881–888.
- 805 **Mayor, C., Brudno, M., Schwartz, J. R., Poliakov, A., Rubin, E. M., Frazer, K. A., Pachter, L. S. and**  
806 **Dubchak, I.** (2000). VISTA : visualizing global DNA sequence alignments of arbitrary length.  
807 *Bioinformatics* **16**, 1046–7.
- 808 **McKay, D. J. and Lieb, J. D.** (2013). A common set of DNA regulatory elements shapes *Drosophila*  
809 appendages. *Dev. Cell* **27**, 306–18.
- 810 **Monteiro, A. and Podlaha, O.** (2009). Wings, Horns, and Butterfly Eyespots: How Do Complex Traits  
811 Evolve? *PLoS Biol.* **7**, e1000037.
- 812 **Ng, M., Diaz-Benjumea, F. J. and Cohen, S. M.** (1995). Nubbin encodes a POU-domain protein  
813 required for proximal-distal patterning in the *Drosophila* wing. *Development* **121**, 589–599.
- 814 **Pearson, J. C., McKay, D. J., Lieb, J. D. and Crews, S. T.** (2016). Chromatin profiling of *Drosophila*  
815 CNS subpopulations identifies active transcriptional enhancers. *Development* **143**, 3723–3732.
- 816 **Peel, A. D.** (2008). The evolution of developmental gene networks: lessons from comparative studies  
817 on holometabolous insects. *Philos. Trans. R. Soc. B Biol. Sci.* **363**, 1539–1547.
- 818 **Pfeiffer, B. D., Jenett, A., Hammonds, A. S., Ngo, T.-T. B., Misra, S., Murphy, C., Scully, A.,**  
819 **Carlson, J. W., Wan, K. H., Laverly, T. R., et al.** (2008). Tools for neuroanatomy and  
820 neurogenetics in *Drosophila*. *Proc. Natl. Acad. Sci. U. S. A.* **105**, 9715–20.
- 821 **Quinlan, A. R. and Hall, I. M.** (2010). BEDTools: a flexible suite of utilities for comparing genomic  
822 features. *Bioinformatics* **26**, 841–2.
- 823 **Robinson, J. T., Thorvaldsdóttir, H., Winckler, W., Guttman, M., Lander, E. S., Getz, G. and**  
824 **Mesirov, J. P.** (2011). Integrative genomics viewer. *Nat. Biotechnol.* **29**, 24–26.
- 825 **Schinko, J. B., Weber, M., Viktorinova, I., Kiupakis, A., Averof, M., Klingler, M., Wimmer, E. A.**  
826 **and Bucher, G.** (2010). Functionality of the GAL4/UAS system in *Tribolium* requires the use of  
827 endogenous core promoters. *BMC Dev Biol* **10**, 53.
- 828 **Schmitt-Engel, C., Schultheis, D., Schwirz, J., Ströhlein, N., Troelenberg, N., Majumdar, U., Dao,**  
829 **V. A., Grossmann, D., Richter, T., Tech, M., et al.** (2015). The iBeetle large-scale RNAi screen  
830 reveals gene functions for insect development and physiology. *Nat. Commun.* **6**, 7822.
- 831 **Shippy, T. D., Coleman, C. M., Tomoyasu, Y. and Brown, S. J.** (2009). Concurrent in situ  
832 hybridization and antibody staining in red flour beetle (*Tribolium*) embryos. *Cold Spring Harb*  
833 *Protoc* **2009**, pdb prot5257.
- 834 **Shlyueva, D., Stampfel, G. and Stark, A.** (2014). Transcriptional enhancers: from properties to  
835 genome-wide predictions. *Nat. Rev. Genet.* **15**, 272–286.

- 836 **Simon, J. M., Giresi, P. G., Davis, I. J. and Lieb, J. D.** (2012). Using formaldehyde-assisted isolation  
837 of regulatory elements (FAIRE) to isolate active regulatory DNA. *Nat. Protoc.* **7**, 256–267.
- 838 **Smith, F. W., Angelini, D. R., Gaudio, M. S. and Jockusch, E. L.** (2014). Metamorphic labral axis  
839 patterning in the beetle *Tribolium castaneum* requires multiple upstream, but few downstream,  
840 genes in the appendage patterning network. *Evol. Dev.* **16**, 78–91.
- 841 **Song, L., Zhang, Z., Grasfeder, L. L., Boyle, A. P., Giresi, P. G., Lee, B.-K., Sheffield, N. C., Gräf,  
842 S., Huss, M., Keefe, D., et al.** (2011). Open chromatin defined by DNaseI and FAIRE identifies  
843 regulatory elements that shape cell-type identity. *Genome Res.* **21**, 1757–67.
- 844 **Sosinsky, A., Honig, B., Mann, R. S. and Califano, A.** (2007). Discovering transcriptional regulatory  
845 regions in *Drosophila* by a nonalignment method for phylogenetic footprinting. *Proc Natl Acad Sci*  
846 *U S A* **104**, 6305–6310.
- 847 **Stark, A., Lin, M. F., Kheradpour, P., Pedersen, J. S., Parts, L., Carlson, J. W., Crosby, M. A.,  
848 Rasmussen, M. D., Roy, S., Deoras, A. N., et al.** (2007). Discovery of functional elements in 12  
849 *Drosophila* genomes using evolutionary signatures. *Nature* **450**, 219–232.
- 850 **Suryamohan, K. and Halfon, M. S.** (2015). Identifying transcriptional *cis*-regulatory modules in  
851 animal genomes. *Wiley Interdiscip. Rev. Dev. Biol.* **4**, 59–84.
- 852 **Thorvaldsdóttir, H., Robinson, J. T. and Mesirov, J. P.** (2013). Integrative Genomics Viewer (IGV):  
853 high-performance genomics data visualization and exploration. *Brief. Bioinform.* **14**, 178–92.
- 854 **Tomoyasu, Y.** (2017). Ultrabithorax and the evolution of insect forewing/hindwing differentiation. *Curr.*  
855 *Opin. Insect Sci.* **19**,.
- 856 **Tomoyasu, Y. and Denell, R. E.** (2004). Larval RNAi in *Tribolium* (Coleoptera) for analyzing adult  
857 development. *Dev Genes Evol* **214**, 575–578.
- 858 **Tomoyasu, Y., Wheeler, S. R. and Denell, R. E.** (2005). Ultrabithorax is required for membranous  
859 wing identity in the beetle *Tribolium castaneum*. *Nature* **433**, 643–647.
- 860 **Tomoyasu, Y., Arakane, Y., Kramer, K. J. and Denell, R. E.** (2009). Repeated Co-options of  
861 Exoskeleton Formation during Wing-to-Elytron Evolution in Beetles. *Curr. Biol.* **19**, 2057–2065.
- 862 **Tribolium Genome Sequencing consortium, C., Richards, S., Gibbs, R. A., Weinstock, G. M.,  
863 Brown, S. J., Denell, R., Beeman, R. W., Gibbs, R., Beeman, R. W., Brown, S. J., et al.** (2008).  
864 The genome of the model beetle and pest *Tribolium castaneum*. *Nature* **452**, 949–955.
- 865 **Uyehara, C. M., Nystrom, S. L., Niederhuber, M. J., Leatham-Jensen, M., Ma, Y., Buttitta, L. A.  
866 and McKay, D. J.** (2017). Hormone-dependent control of developmental timing through  
867 regulation of chromatin accessibility. *Genes Dev.* **31**, 862–875.
- 868 **Wang, L., Wang, S., Li, Y., Paradesi, M. S. and Brown, S. J.** (2007). BeetleBase: the model organism  
869 database for *Tribolium castaneum*. *Nucleic Acids Res* **35**, D476-9.
- 870 **Wolff, C., Schröder, R., Schulz, C., Tautz, D. and Klingler, M.** (1998). Regulation of the *Tribolium*  
871 homologues of caudal and hunchback in *Drosophila*: evidence for maternal gradient systems in a  
872 short germ embryo. *Development* **125**, 3645–54.
- 873 **Zabidi, M. A., Arnold, C. D., Schernhuber, K., Pagani, M., Rath, M., Frank, O. and Stark, A.** (2015).  
874 Enhancer-core-promoter specificity separates developmental and housekeeping gene regulation.  
875 *Nature* **518**, 556–9.
- 876 **Zdobnov, E. M. and Bork, P.** (2007). Quantification of insect genome divergence. *Trends Genet.* **23**,  
877 16–20.
- 878 **Zhu, X., Rudolf, H., Healey, L., François, P., Brown, S. J., Klingler, M. and El-Sherif, E.** (2017).  
879 Speed regulation of genetic cascades allows for evolvability in the body plan specification of  
880 insects. *Proc. Natl. Acad. Sci. U. S. A.* 201702478.
- 881 **Zinzen, R. P., Cande, J., Ronshaugen, M., Papatsenko, D. and Levine, M.** (2006). Evolution of the  
882 Ventral Midline in Insect Embryos. *Dev. Cell* **11**, 895–902.

883

884

885 **FIGURES**

886

887

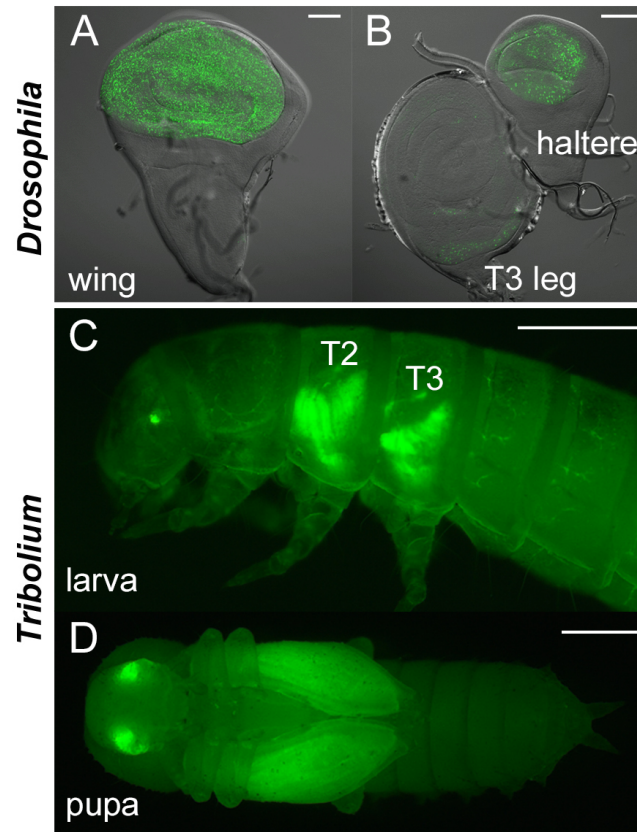

888

889 **Fig. 1. *nub* enhancer trap expression in *Drosophila* and *Tribolium*.** (A, B) The  
890 *nub* enhancer trap expression in the wing disc (A), and the haltere and T3 leg discs (B)  
891 in *Drosophila*. (C, D) Expression pattern of the *nub* enhancer trap line (*pu11*) at the  
892 larval (C) and pupal (D) stage in *Tribolium*. Scale bar: 0.5mm.

893

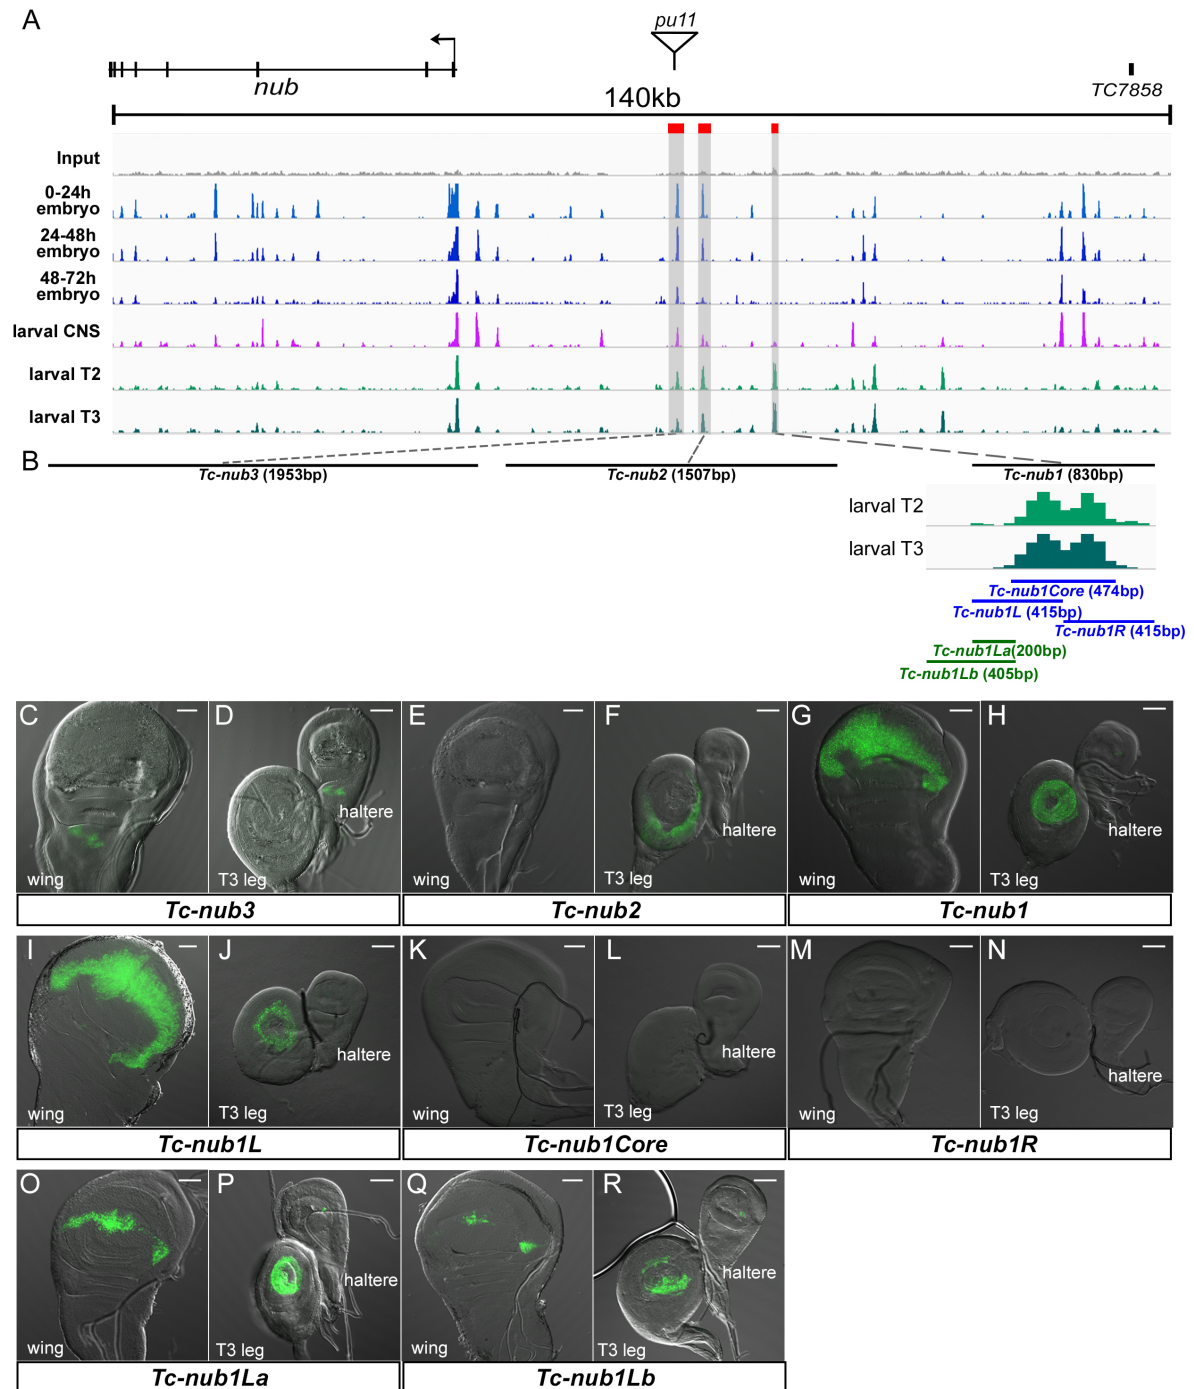

894  
895  
896  
897  
898  
899  
900  
901  
902  
903

**Fig. 2. Identification of the *Tribolium nub* wing enhancer with FAIRE and inter-species reporter assay.** (A) FAIRE profiles at the *Tribolium nub* locus in six different tissues/stages. The *pu11* insertion site is indicated with a triangle. Three peaks near the *pu11* insertion site chosen for evaluating enhancer activity were marked with red boxes. (B) Summary of the regions tested by the reporter assay. The distance between *Tc-nub1*, *2*, and *3* are not scaled. The magnified view of the FAIRE peak corresponding to *Tc-nubL1* is also presented. (C-R) Enhancer activity of each *Tribolium* genomic region tested in the *Drosophila* imaginal discs. Scale bar: 50  $\mu$ m.

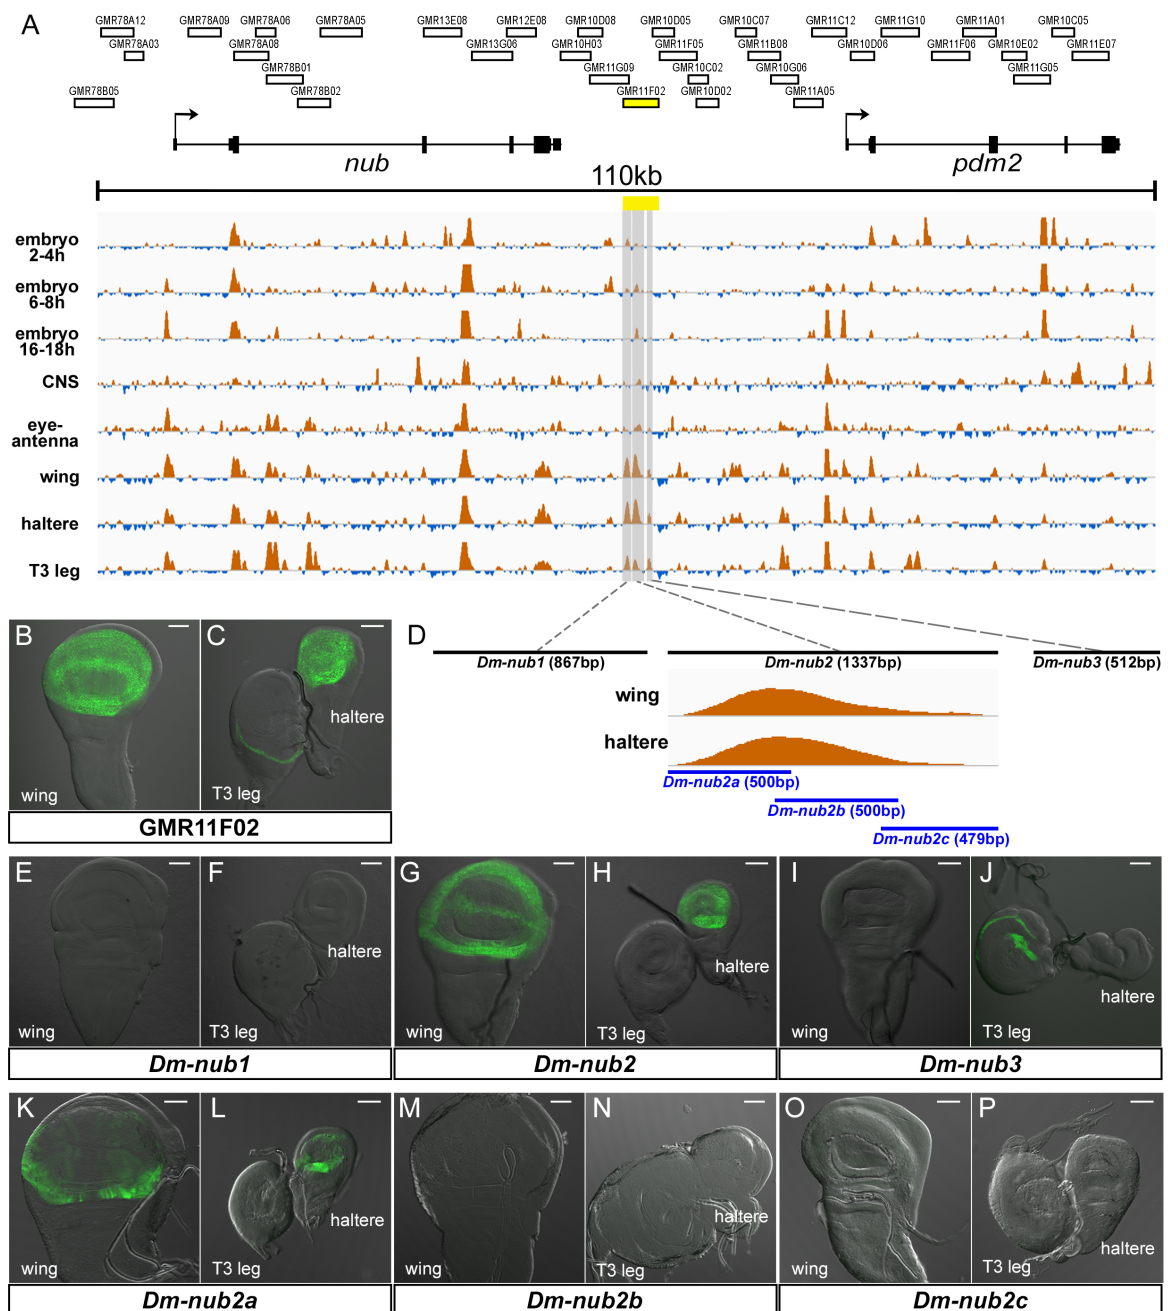

904

905

**Fig. 3. Identification of the *Drosophila nub* wing enhancer. (A)**

906

FAIRE profiles from eight different tissues/stages at the *nub* and *pdm2* loci in *Drosophila*. The regions surveyed in the FlyLight project are also indicated. The region that shows wing enhancer activity is marked by yellow.

907

(B, C) Expression driven by GMR11F02 in the *Drosophila* imaginal discs. (D)

908

Summary of the regions within GMR11F02 tested by the reporter assay. The relative distance between *Dm-nub1*, 2, and 3 are not scaled. The magnified view of the

909

*Dm-nub2* peak is also included. (E-P) Enhancer activity of each *Drosophila* genomic region tested in the *Drosophila* imaginal discs. Scale bar: 50  $\mu$ m.

910

(E-P) Enhancer activity of each *Drosophila* genomic region tested in the *Drosophila* imaginal discs. Scale bar: 50  $\mu$ m.

911

(E-P) Enhancer activity of each *Drosophila* genomic region tested in the *Drosophila* imaginal discs. Scale bar: 50  $\mu$ m.

912

(E-P) Enhancer activity of each *Drosophila* genomic region tested in the *Drosophila* imaginal discs. Scale bar: 50  $\mu$ m.

913

(E-P) Enhancer activity of each *Drosophila* genomic region tested in the *Drosophila* imaginal discs. Scale bar: 50  $\mu$ m.

914

(E-P) Enhancer activity of each *Drosophila* genomic region tested in the *Drosophila* imaginal discs. Scale bar: 50  $\mu$ m.

915  
916  
917  
918  
919

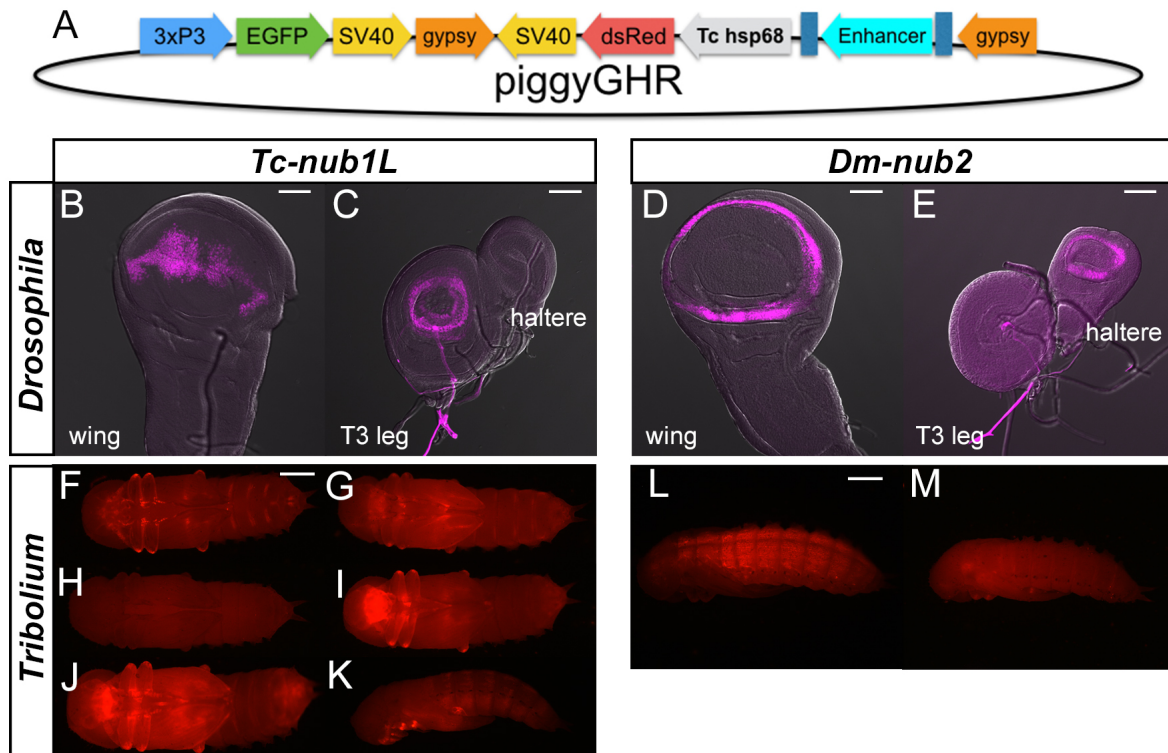

920  
921  
922  
923  
924  
925  
926  
927

**Fig. 4. Reporter assay with the *Tc-hsp68* promoter construct in *Drosophila* and *Tribolium*.** (A) The piggyGHR construct. (B-E) Enhancer activity of *Tc-Nub1L* (B, C) and *Dm-nub2* (D, E) tested with the piggyGHR construct in *Drosophila*. (F-M) Enhancer activity of *Tc-nub1L* (F-K) and *Dm-nub2* (L, M) tested with piggyGHR at the pupal stage in *Tribolium*. Six independent lines for *Tc-nub1L* (F-K) and two for *Dm-nub2* (L, M) were shown. Scale bar: 50  $\mu$ m (B-E), 0.5 mm (F-M)

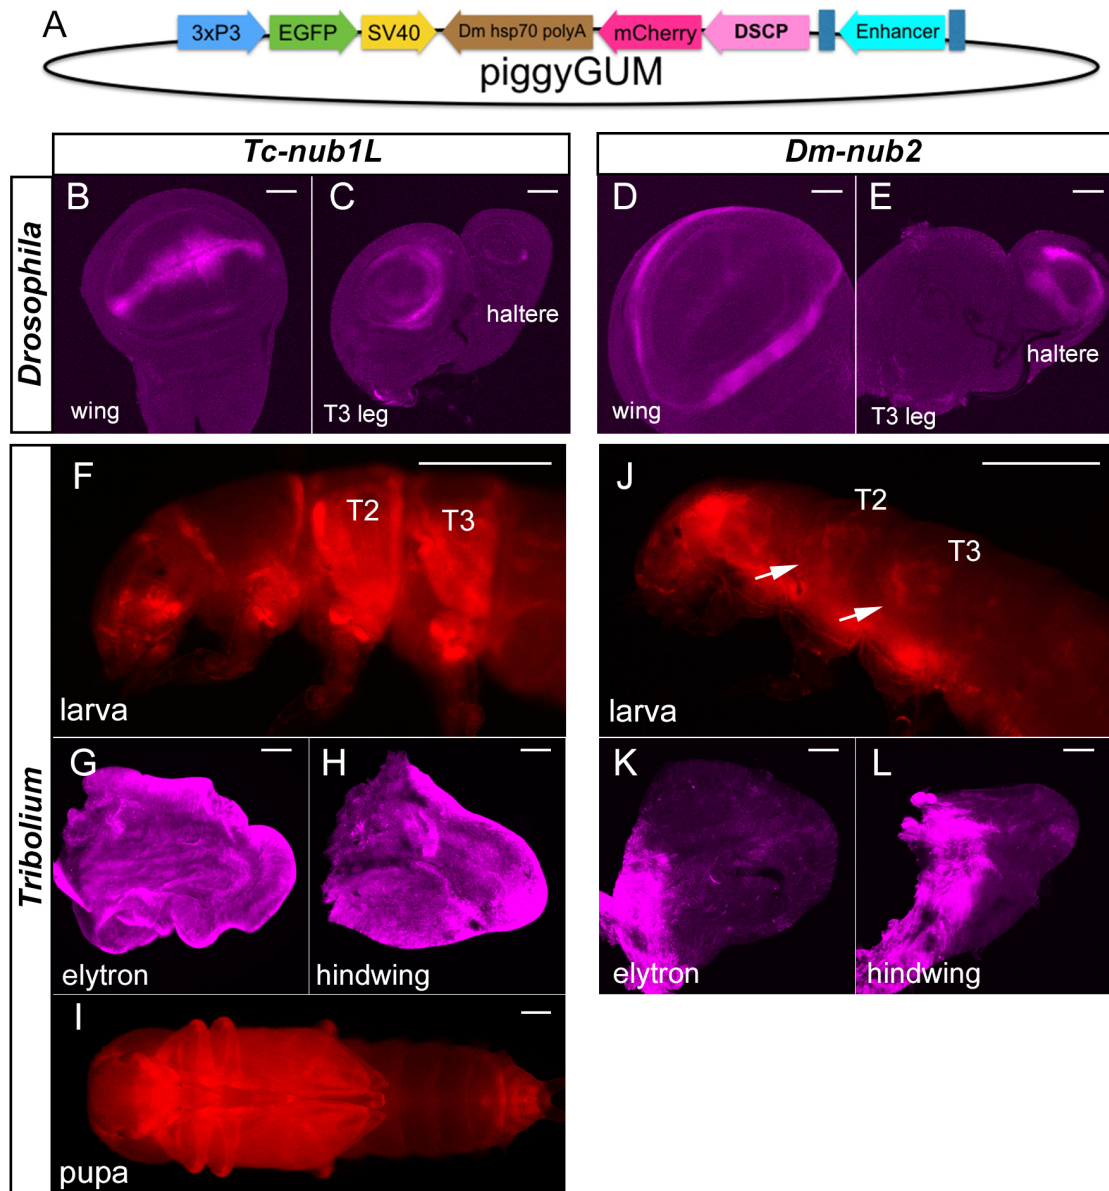

928  
929  
930  
931  
932  
933  
934  
935

**Fig. 5. Reporter assay with the *Drosophila* synthetic core promoter construct in *Drosophila* and *Tribolium*.** (A) The piggyGUM construct. (B-E) Enhancer activity of *Tc-Nub1L* (B, C) and *Dm-nub2* (D, E) tested with the piggyGUM construct in *Drosophila*. (F-L) Reporter expression of piggyGUM-*Tc-nub1L* (F-I) and piggyGUM-*Dm-nub2* (J-L) in *Tribolium*. Scale bar: 50  $\mu$ m (B-E, G, H, K, L), 0.5 mm (F, J, I)

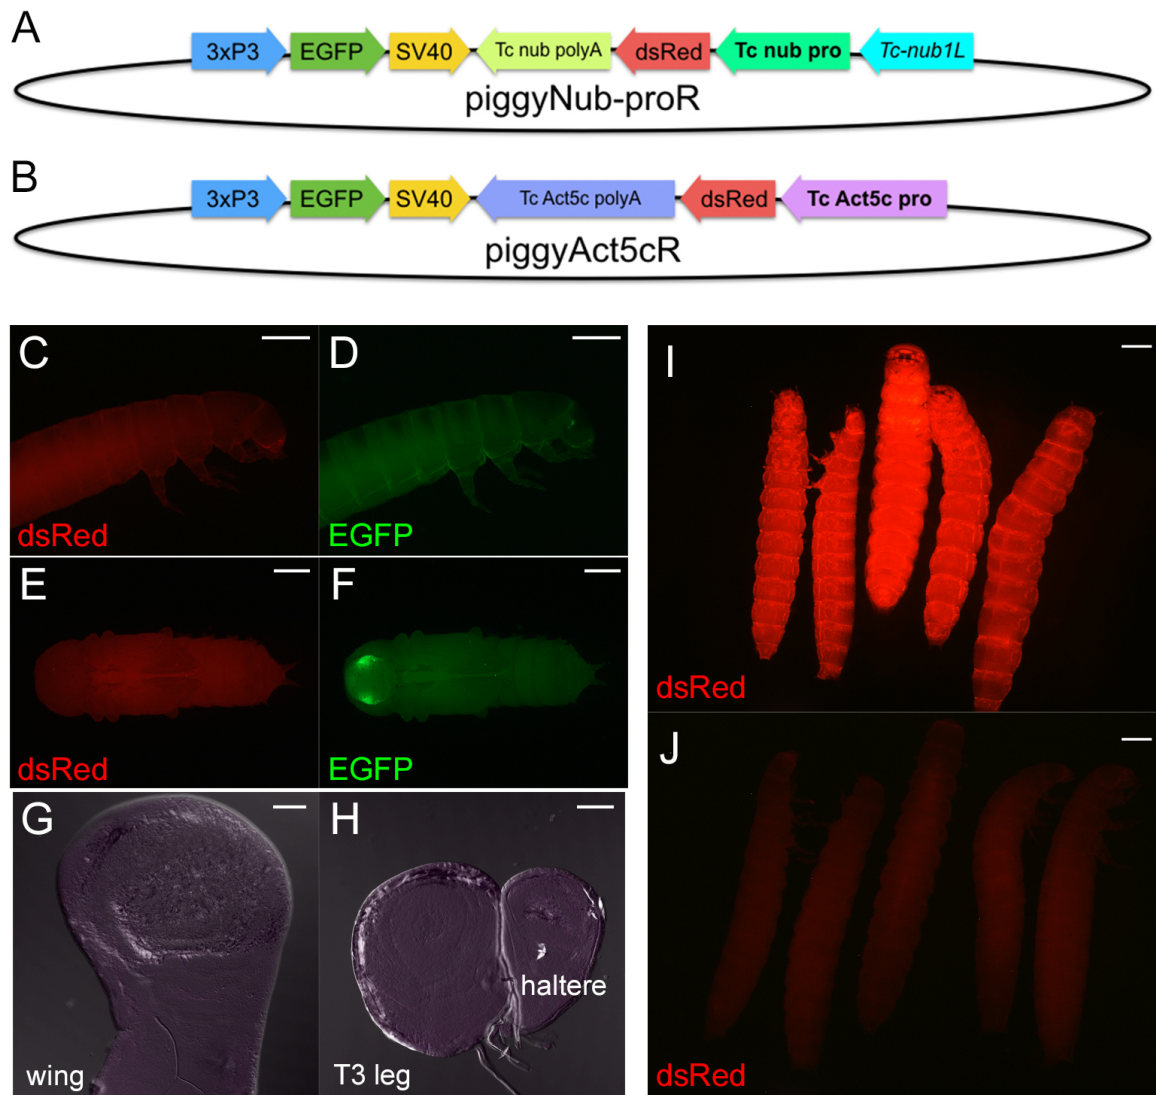

936  
937  
938  
939  
940  
941  
942  
943  
944  
945  
946  
947

**Fig. 6. Reporter assay with the *Tribolium* endogenous promoters in *Drosophila* and *Tribolium*.** (A) The piggyNub-proR construct. (B) The piggyAct5cR construct. (C-F) Enhancer activity of *Tc-Nub1L* tested with the piggyNub-proR construct. dsRed reporter expression is completely absent (C, E), even though EGFP (D, F) confirms the presence of the construct transgened. (G, H) The piggyNub-proR reporter expression in *Drosophila* imaginal discs. (I) dsRed expression of the piggyAct5cR at the larval stage in *Tribolium*. (J) dsRed expression of the piggyNub-proR with *Tc-Nub1L* at the larval stage in *Tribolium*, with the same exposure time as (I). Scale bar: 0.5 mm (C-F, I, J), 50  $\mu$ m (G, H).



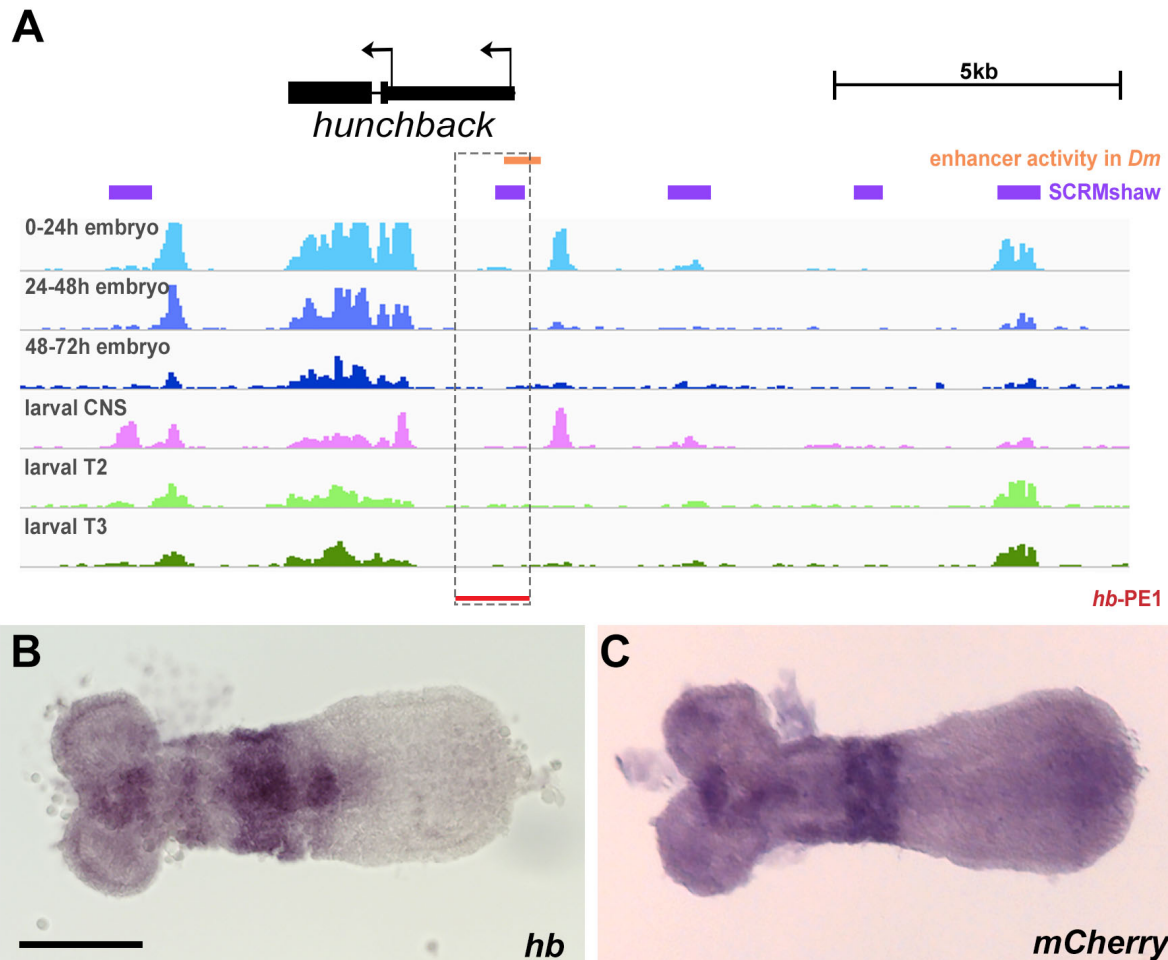

948  
949  
950  
951  
952  
953  
954  
955

**Fig. 7. *hb* enhancer analysis in *Tribolium*.** (A) FAIRE profiles at the *hb* locus. Orange bar: blastoderm enhancer activity when introduced in *Drosophila*, purple bars: SCRMshaw predictions, red bar: the 1340bp fragment tested in this study (*hb-PE1*). (B) *hb* expression at the early germband stage detected by *in situ* hybridization for *hb* transcript. (C) *mCherry* reporter gene expression of piggyGUM-*hb-PE1* detected by *in situ* hybridization for *mCherry* transcript. Scale bar: 100  $\mu$ m (B, C).

|                |              |              |              |                |                |
|----------------|--------------|--------------|--------------|----------------|----------------|
| <b>T2</b>      | 1 / 3        |              |              |                |                |
| <b>brain</b>   | 15427 / 7262 | 11634 / 5258 |              |                |                |
| <b>48-72hr</b> | 6428 / 8134  | 5575 / 7259  | 1602 / 4089  |                |                |
| <b>24-48hr</b> | 10380 / 6729 | 9572 / 6031  | 3162 / 6689  | 863 / 40       |                |
| <b>0-24hr</b>  | 17450 / 8800 | 14138 / 6808 | 9002 / 8279  | 7651 / 1041    | 2407 / 586     |
|                | <b>T3</b>    | <b>T2</b>    | <b>brain</b> | <b>48-72hr</b> | <b>24-48hr</b> |

956  
957  
958  
959

**Table 1. The number of differentially open peaks**

960 **SUPPLEMENTAL FIGURES**

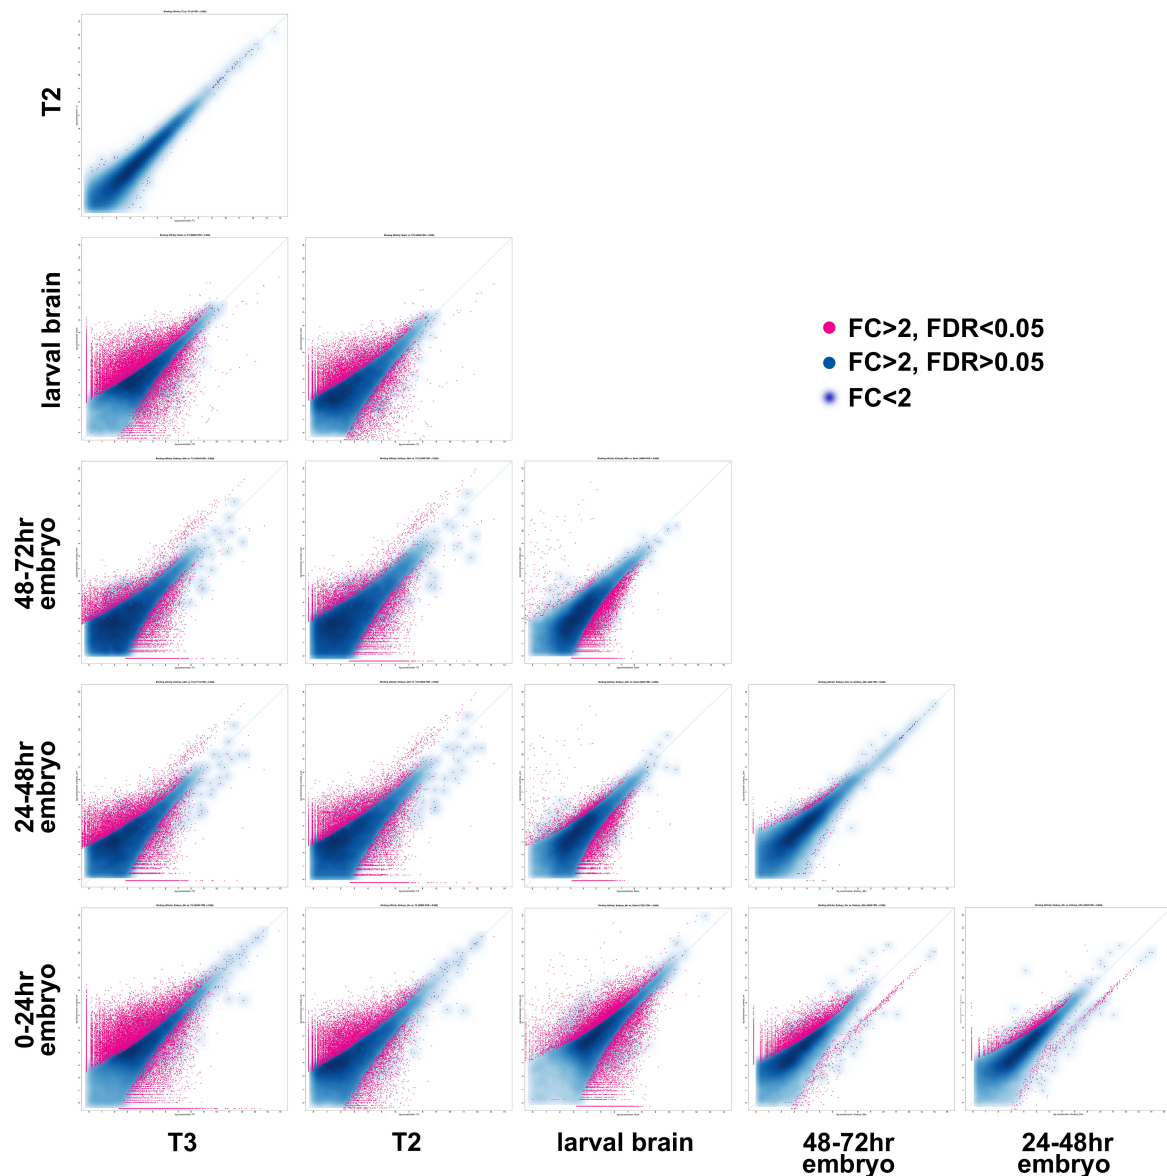

961  
962  
963  
964  
965  
966  
967

**Fig. S1. Differentially open peak analysis.** Pairwise analysis of differentially open peaks between samples. Red represents peaks that exhibit over two-fold change (FC) between samples with the false discovery rate (FDR) < 0.05, while blue represents peaks over two-fold change but with FDR > 0.05. The blue cloud represents peaks with less than two-fold change between samples.

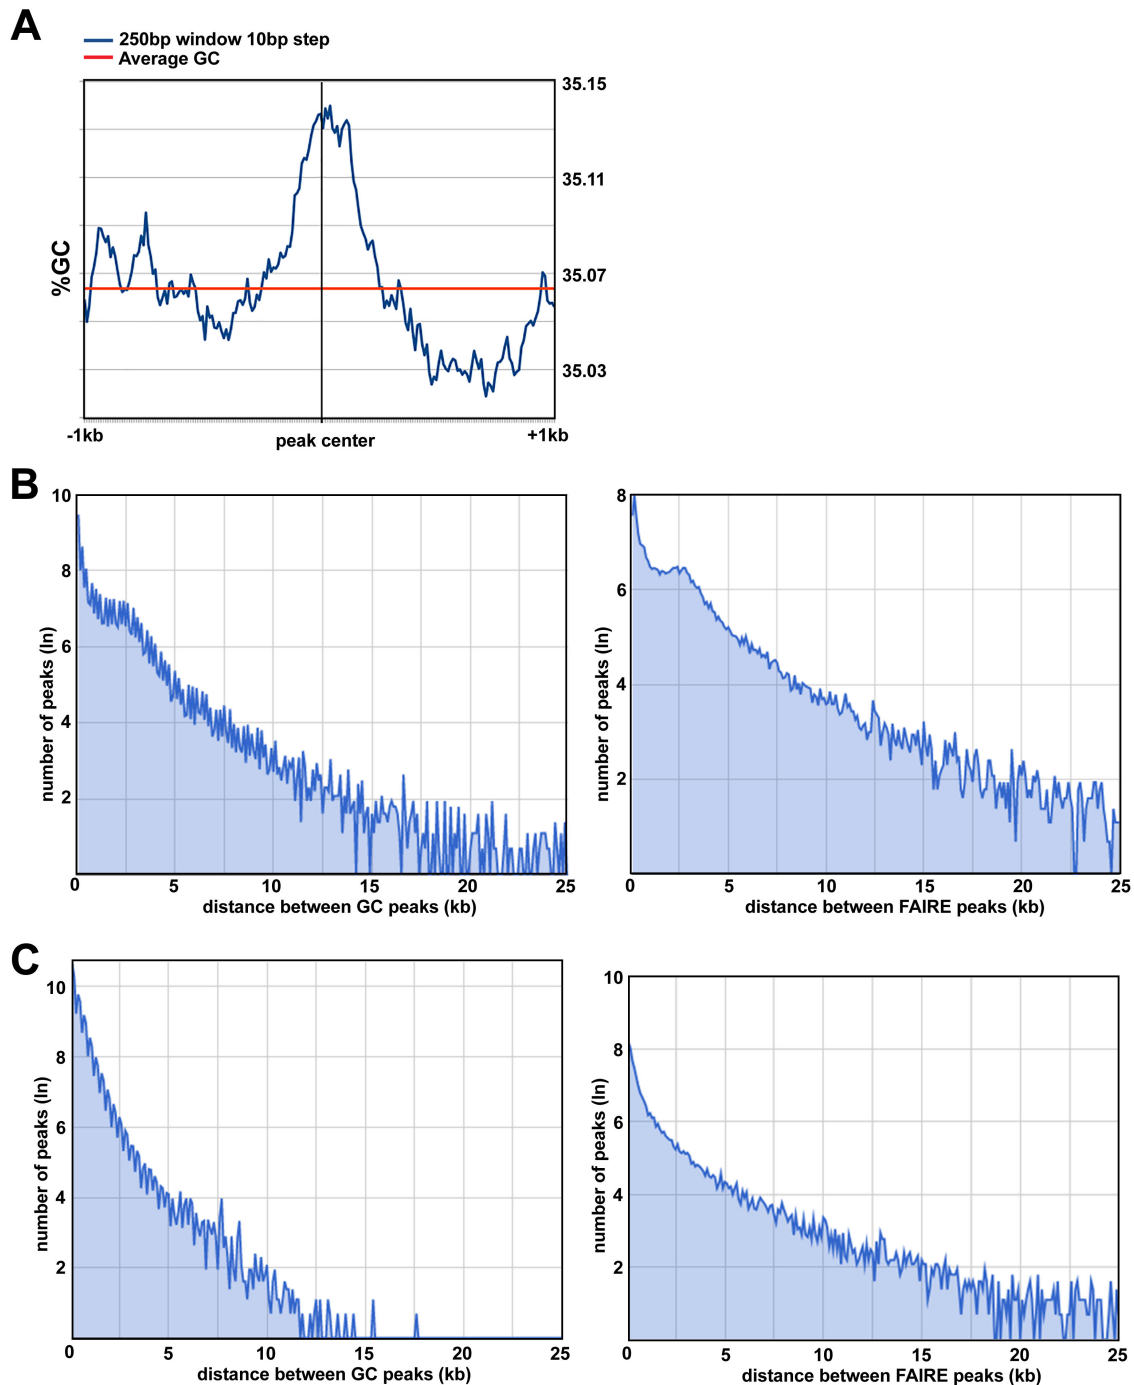

968  
969  
970  
971  
972  
973  
974  
975

**Fig. S2. Distribution of FAIRE peaks and GC-rich regions.**

(A) Correlation between FAIRE peaks and high GC contents in *Tribolium*. (B) Distribution of intervals between FAIRE peaks in *Tribolium* and *Drosophila*. (C) Distribution of intervals between GC-rich regions in *Tribolium* and *Drosophila*. Note that there is a significant accumulation around 3 kb in *Tribolium* but not in *Drosophila* (B, C).

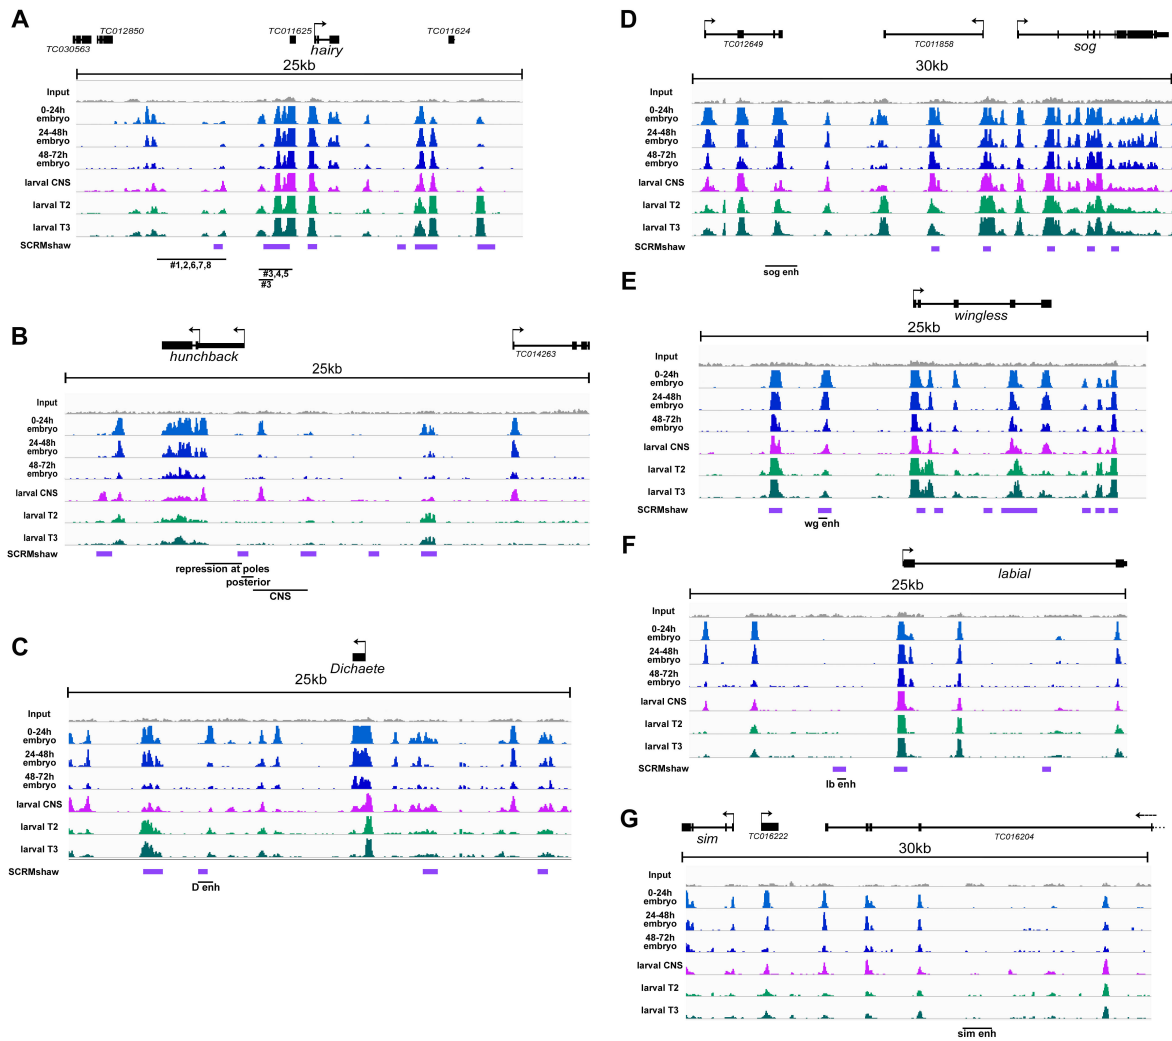

976  
977  
978  
979  
980  
981  
982  
983  
984  
985  
986  
987

**Fig. S3. Comparison of the FAIRE data to previous enhancer studies.** (A) *hairy* (*h*), (B) *hunchback* (*hb*), (C) *Dichaete* (*D*), (D) *short gastrulation* (*sog*), (E) *wingless* (*wg*), (F) *labial* (*lab*), (G) *single-minded* (*sim*). Previously described possible enhancer regions at these loci are shown by black lines underneath the FAIRE profiles. SCRMshaw predictions are also shown (purple). Only the enhancers at the *h* locus have been tested in the native *Tribolium* context, while other enhancers were evaluated in the cross-species context. FAIRE peaks match well with the previously described enhancers for *h*, *hb*, *D*, *sog*, and *wg* (A-E), while no significant overlaps are observed between FAIRE peaks and the previously described enhancers for *lab* and *sim*.

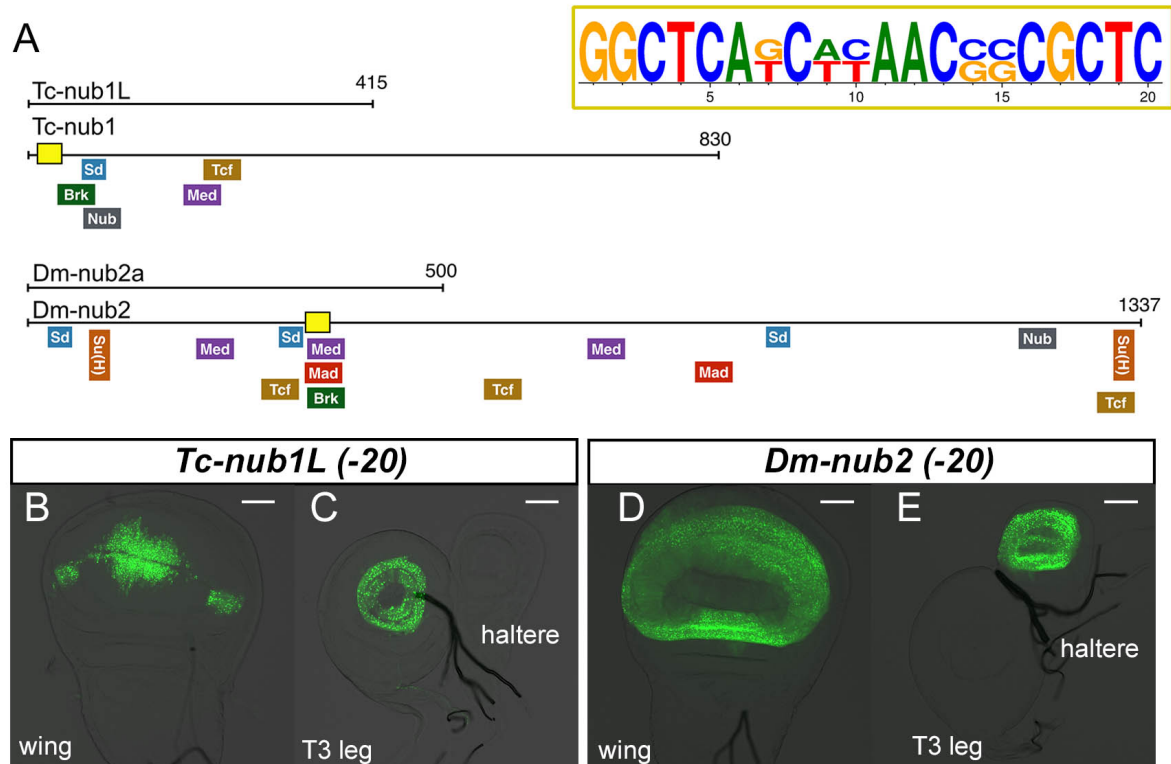

988  
989  
990  
991  
992  
993  
994  
995  
996  
997

**Fig. S4. Deletion of the motif shared between the *Tribolium* and *Drosophila nub* wing enhancers.** (A) Locations of TF binding sites within the *Tribolium* and *Drosophila nub* wing enhancers. A 20bp shared sequence between the two enhancers is shown with a yellow box. (B, C) Activities of the *Tribolium* and *Drosophila nub* wing enhancers when the conserved 20bp shared sequence is deleted. No significant changes in enhancer activity are observed, indicating that the 20bp sequence is dispensable from the activity of the two enhancers. Scale bar: 50  $\mu$ m.

998 **SUPPLEMENTAL TABLES**

999

| Training_set <sup>a</sup> | n <sup>b</sup> | FAIRE<br>0-24hr | FAIRE<br>24-48hr | FAIRE<br>48-72hr | FAIRE<br>larvalT2 | FAIRE<br>larvalT3 | combined<br>(embryo) | combined<br>(larval) | combined     |
|---------------------------|----------------|-----------------|------------------|------------------|-------------------|-------------------|----------------------|----------------------|--------------|
| ap                        | 129            | 60.5%           | 55.8%            | 55.0%            | 73.6%             | 72.1%             | nd <sup>c</sup>      | nd                   | nd           |
| blastoderm                | 138            | 76.1%           | 72.5%            | 68.8%            | 87.0%             | 89.9%             | nd                   | nd                   | nd           |
| cns                       | 256            | 86.7%           | 82.0%            | 83.6%            | 93.4%             | 93.0%             | nd                   | nd                   | nd           |
| dorsal_ectoderm           | 183            | 79.2%           | 74.9%            | 74.3%            | 88.0%             | 87.4%             | nd                   | nd                   | nd           |
| dv                        | 137            | 69.3%           | 65.0%            | 67.2%            | 86.9%             | 84.7%             | nd                   | nd                   | nd           |
| ectoderm+ectoderm.2       | 280            | 76.4%           | 73.6%            | 74.6%            | 86.8%             | 88.2%             | nd                   | nd                   | nd           |
| endoderm                  | 109            | 68.8%           | 63.3%            | 66.1%            | 78.0%             | 82.6%             | nd                   | nd                   | nd           |
| imaginal_disc (1+2)       | 246            | 85.4%           | 83.3%            | 81.3%            | 93.9%             | 94.3%             | nd                   | nd                   | nd           |
| mesectoderm               | 42             | 83.3%           | 81.0%            | 81.0%            | 97.6%             | 92.9%             | nd                   | nd                   | nd           |
| somatic_muscle            | 42             | 78.6%           | 76.2%            | 81.0%            | 83.3%             | 88.1%             | nd                   | nd                   | nd           |
| ventral_ectoderm          | 129            | 89.1%           | 86.8%            | 86.8%            | 90.7%             | 92.2%             | nd                   | nd                   | nd           |
| wing.2                    | 99             | 91.9%           | 90.9%            | 90.9%            | 98.0%             | 98.0%             | nd                   | nd                   | nd           |
| <b>all_combined</b>       | <b>1214</b>    | <b>74.1%</b>    | <b>70.5%</b>     | <b>71.1%</b>     | <b>85.1%</b>      | <b>85.3%</b>      | <b>78.8%</b>         | <b>88.1%</b>         | <b>90.3%</b> |

<sup>a</sup> Training sets as listed in Kazemian et al. (2014). "all\_combined" is all 1214 enhancer predictions. Not all individual training sets are shown.

<sup>b</sup> Total predicted enhancers

<sup>c</sup> nd: not done

1000  
1001  
1002  
1003  
1004  
1005  
1006

**Table S1. Overlap between SCRMshaw predictions and FAIRE peaks**

**Table S2. The list of FARIE peaks that overlap SCRMshaw. (attached separately)**

| Enhancer           | wing           | haltere     | leg | antennae<br>/eyes            | CNS* | trachea | gut | mouthpart | salivary<br>gland* | others                                                 |
|--------------------|----------------|-------------|-----|------------------------------|------|---------|-----|-----------|--------------------|--------------------------------------------------------|
| <i>Tc-nub1</i>     | DV<br>boundary | a few cells | +   | antennae &<br>optical nerves | ++   | +       | ++  | +         | -                  | a circle of cells near the<br>posterior end            |
| <i>Tc-nub2</i>     | -              | -           | +   | antennae                     | +    | -       | +   | +         | +                  |                                                        |
| <i>Tc-nub3</i>     | notum          | notum       | -   | -                            | +    | -       | ++  | +         | +                  | spiracles                                              |
| <i>Tc-nub1Core</i> | -              | -           | -   | -                            | +    | -       | +   | +         | +                  | a line of cells in epidermis                           |
| <i>Tc-nub1L</i>    | DV<br>boundary | a few cells | +   | antennae &<br>optical nerves | ++   | +       | +   | +         | -                  |                                                        |
| <i>Tc-nub1R</i>    | -              | -           | -   | -                            | +    | -       | ++  | -         | +                  | spiracles, a circle of cells<br>near the posterior end |
| <i>Tc-nub1a</i>    | DV<br>boundary | a few cells | +   | antennae &<br>optical nerves | ++   | -       | ++  | +         | +                  |                                                        |
| <i>Tc-nub1Lb</i>   | DV<br>boundary | a few cells | +   | antennae &<br>optical nerves | ++   | +       | ++  | +         | +                  |                                                        |

\*CNS and salivary gland expression may not be specific to the construct tested.

1007  
1008  
1009  
1010

**Table S3. Expression of *Tc nub* reporter constructs outside of the wing and leg imaginal disc in *Drosophila***

| Enhancer        | wing  | haltere | leg | antennae /eyes | CNS | trachea | gut | mouthpart | Salivary gland |
|-----------------|-------|---------|-----|----------------|-----|---------|-----|-----------|----------------|
| <i>Dm-nub1</i>  | -     | -       | -   | -              | ++  | -       | ++  | -         | +              |
| <i>Dm-nub2</i>  | pouch | pouch   | -   | -              | ++  | -       | ++  | +         | +              |
| <i>Dm-nub3</i>  | -     | -       | ++  | -              | ++  | -       | ++  | +         | +              |
| <i>Dm-nub2a</i> | pouch | pouch   | -   | +              | +   | -       | +   | +         | -              |
| <i>Dm-nub2b</i> | -     | -       | -   | -              | +   | -       | +   | -         | -              |
| <i>Dm-nub2c</i> | -     | -       | -   | -              | +   | -       | ++  | -         | -              |

\*CNS and salivary gland expression may not be specific to the construct tested.

**Table S4. Expression of *Dm nub* reporter constructs outside of the wing and leg imaginal disc in *Drosophila***

| Fragment           | length | primer 1                         | primer 2                   |
|--------------------|--------|----------------------------------|----------------------------|
| <i>Tc-nub1</i>     | 830bp  | CACCATAATGGGAGGTGGTTAATGG        | TATAAGTCGCAGGCTCATCAT      |
| <i>Tc-nub2</i>     | 1507bp | CACCCATTGTTAAGTGTGTTAAAAA        | CAACAATCTATAAAGCTAACG      |
| <i>Tc-nub3</i>     | 1953bp | CACCAAGACATGATGCTTAATGCTT        | ACCTTAATTAATGTATTAACA      |
| <i>Tc-nub1Core</i> | 474bp  | CACCTTATGTGTCGTCGGGCTTTAT        | TTCCGATTGCCGTCTGCGTAT      |
| <i>Tc-nub1L</i>    | 415bp  | CACCCCTGCTGCGACCTTGTGGT          | TATAAGTCGCAGGCTCATCAT      |
| <i>Tc-nub1R</i>    | 415bp  | CACCATAATGGGAGGTGGTTAATGG        | ACTTATCTTAAGATATGTGC       |
| <i>Tc-nub1La</i>   | 200bp  | TATAAGTCGCAGGCTCATCAT            | ACATACGCAGACGGCAATCGGAA    |
| <i>Tc-nub1Lb</i>   | 405bp  | CACCATTTTTTCAGCTGTAATTTAAA       | ACATACGCAGACGGCAATCGGAA    |
| <i>Tc-hb PE1</i>   | 1340bp | CTATTTACGCAACGGCTATTTTCA         | TGGTGGAGATGTTATGGTATGGTC   |
| <i>Dm-nub1</i>     | 867bp  | CACCTTTTAATAAAAAACATAAAGTA       | ATATGGGTATGTGTCATTTGT      |
| <i>Dm-nub2</i>     | 1337bp | CACCATTGTAGAAGACGCAGCTTTG        | TTGCTATTTAAATTTTGATGG      |
| <i>Dm-nub3</i>     | 512bp  | CACCAAACGAGCTCGATCCGCGGCT        | TTTCATAAAGCTCATAAAGGT      |
| <i>Dm-nub2a</i>    | 500bp  | CACCATTGTAGAAGACGCAGCTTTG        | TGGATATTAGTGCAAAACGCT      |
| <i>Dm-nub2b</i>    | 500bp  | CACCCCTGCCGCTCCTCCTGCCCAT        | ACAATTATTGTCACAAAACA       |
| <i>Dm-nub2c</i>    | 479bp  | CACCAATTACTTATTTTCATTATA         | TTGCTATTTAAATTTTGATGG      |
| pFGUM              | 3379bp | ACTGGGCCGCCCCCTTCGTCCTCAAGAATTCG | ACTGGGCCGCGCCTCCGGAACATAAT |
| <i>mCherry</i>     | 362bp  | CGACATCCCCGACTACTTGA             | TGATGTTGACGTTGTAGGCG       |

**Table S5. Primers used in this study**

**Table S6. The list of differentially accessible FARIE peaks. (attached separately)**
